# Supplementary material for: spatialLIBD: an R/Bioconductor package to visualize spatially-resolved transcriptomics data
Source: PubMed Central journal article supplement (PMC9188087; doi:10.1186/s12864-022-08601-w), 2022-06-10
Supplement: 12864_2022_8601_MOESM2_ESM.pdf [file 12864_2022_8601_MOESM2_ESM.pdf]

```

library("spatialLIBD")

## Download the Maynard et al, Nat Neurosci, 2021 data
spe <- fetch_data("spe")

## Visualize the result from a shared-nearest neighbor (k = 50) graph
## cut at 7 clusters (k7), hence SNN_k50_k7. This graph was constructed
## across all samples, such that cluster 1 on sample 1 has the same meaning
## as cluster 1 on samples 2, 3, ... n.
vis_grid_clus(
  spe = spe,
  clustervar = "SNN_k50_k7",
  pdf_file = "grid_SNN_k50_k7.pdf",
  colors = setNames(Polychrome::palette36.colors(7), seq_len(7)),
  point_size = 2,
  alpha = 0.75
)

## Visualize the chrM expression ratio across all samples with the
## "magma" color palette in the reverse direction (-1) such that darker colors
## represent higher values
vis_grid_gene(
  spe = spe,
  geneid = "expr_chrM_ratio",
  pdf_file = "grid_expr_chrM_ratio.pdf",
  minCount = -1,
  cont_colors = viridisLite::viridis(21, direction = -1, option = "magma"),
  point_size = 2
)

## Visualize the normalized expression values (logcounts) for the gene
## MOBP which has a higher expression in the white matter. Here we use the
## "plasma" color palette with the regular direction (+1) such that
## higher values are represented with brighter colors.
vis_grid_gene(
  spe = spe,
  geneid = rowData(spe)$gene_search[rowData(spe)$gene_name == "MOBP"],
  pdf_file = "grid_MOBP.pdf",
  minCount = -1,
  cont_colors = viridisLite::viridis(21, direction = 1, option = "plasma"),
  point_size = 2
)

## For reproducibility
packageVersion("spatialLIBD")
# [1] 1.7.13â€™

```



151507

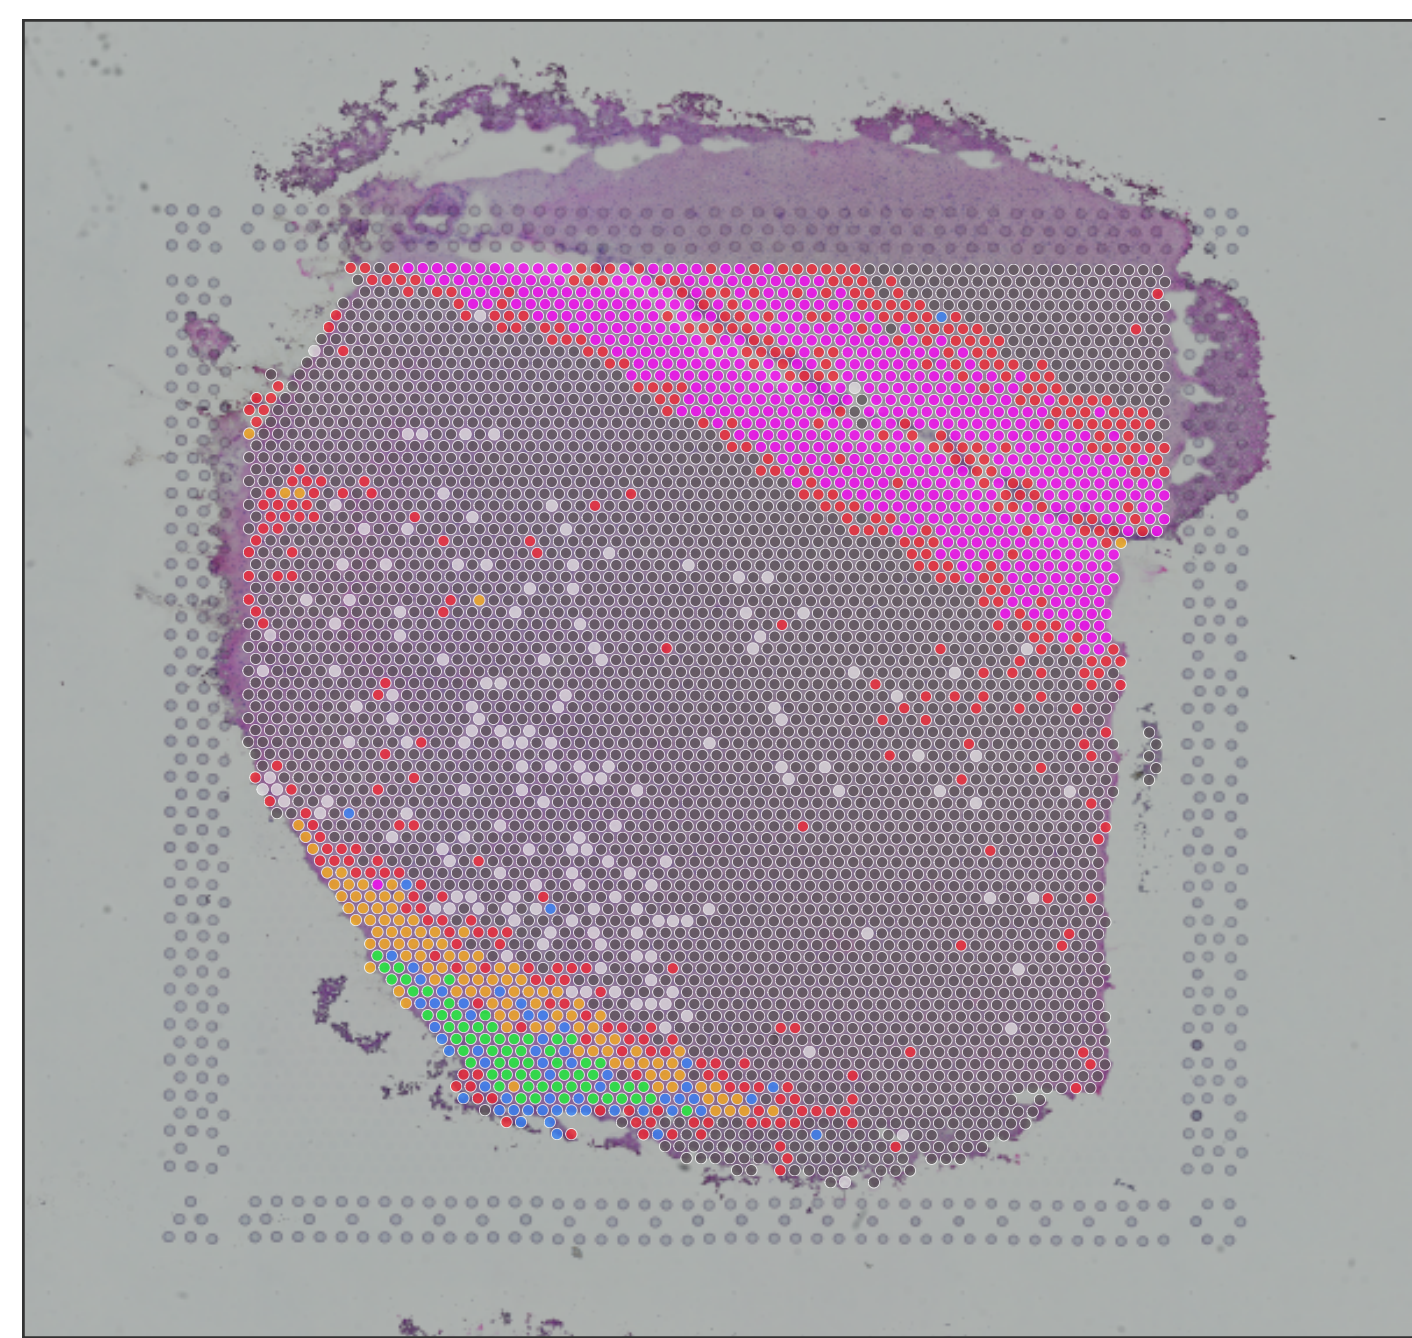

- 1
- 2
- 3
- 4
- 5
- 6
- 7

151508

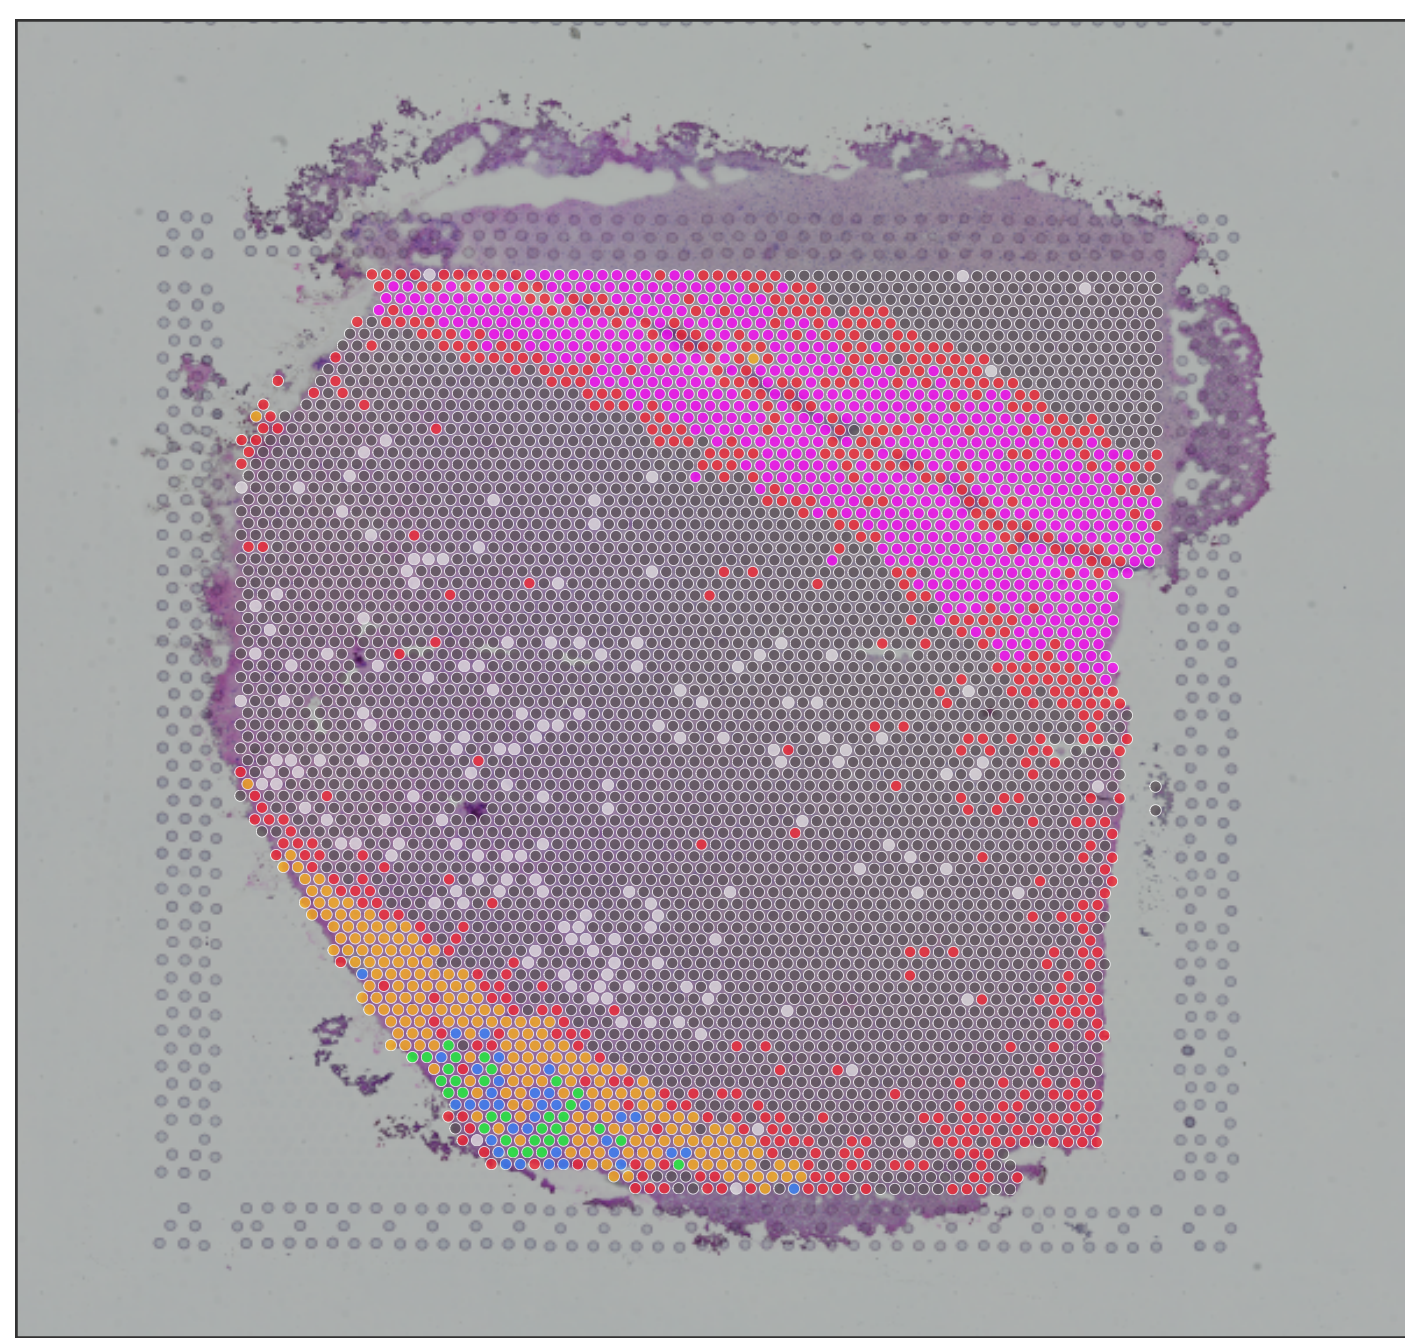

- 1
- 2
- 3
- 4
- 5
- 6
- 7

151509

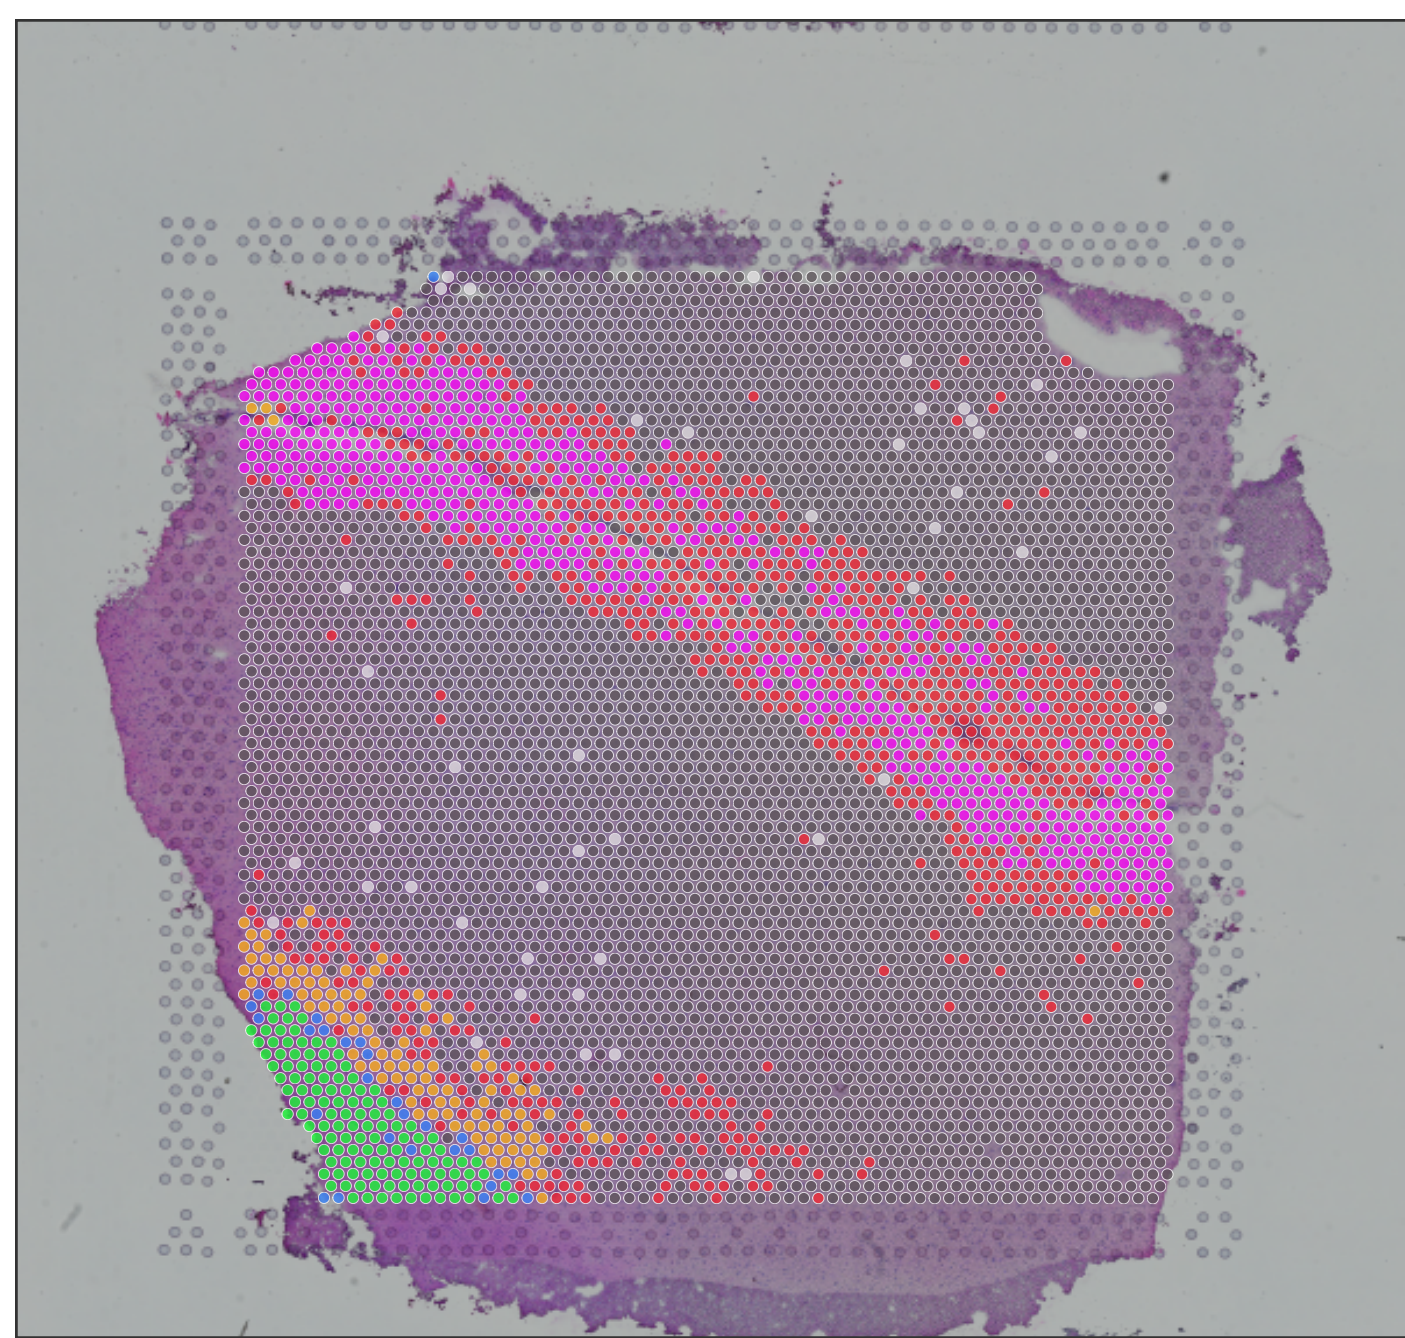

- 1
- 2
- 3
- 4
- 5
- 6
- 7

151510

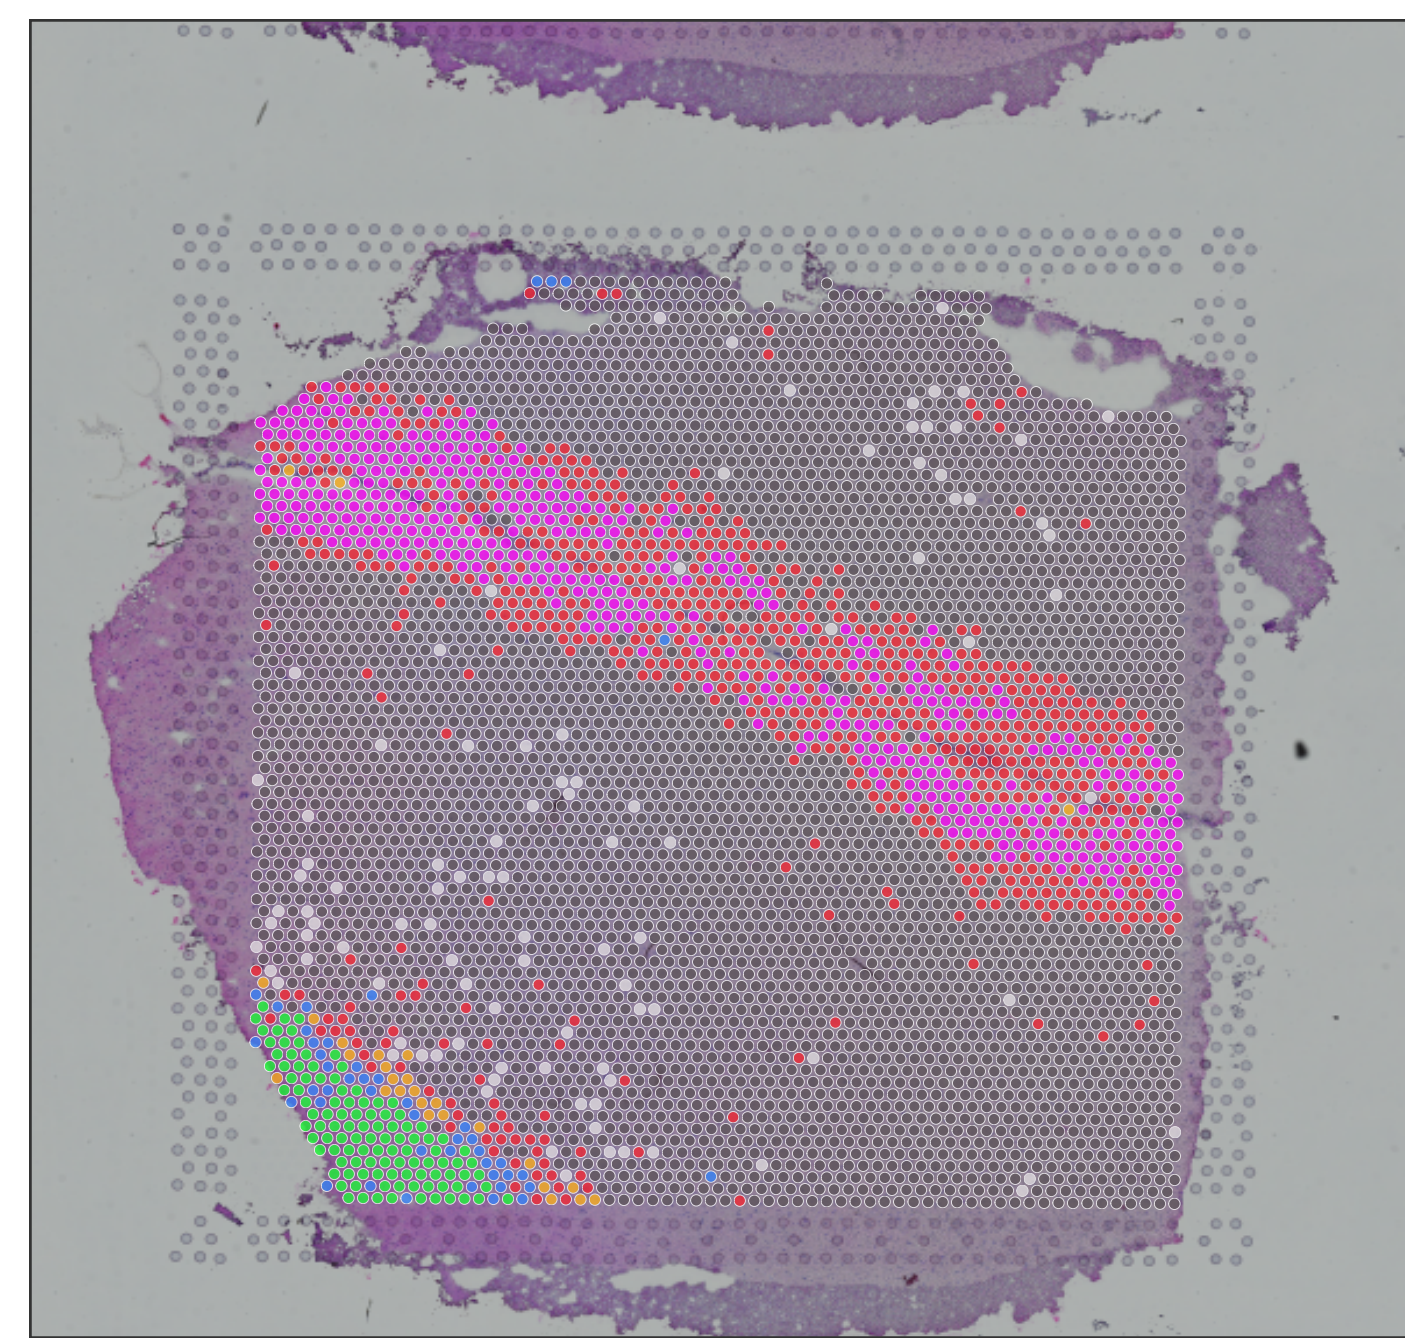

- 1
- 2
- 3
- 4
- 5
- 6
- 7

151669

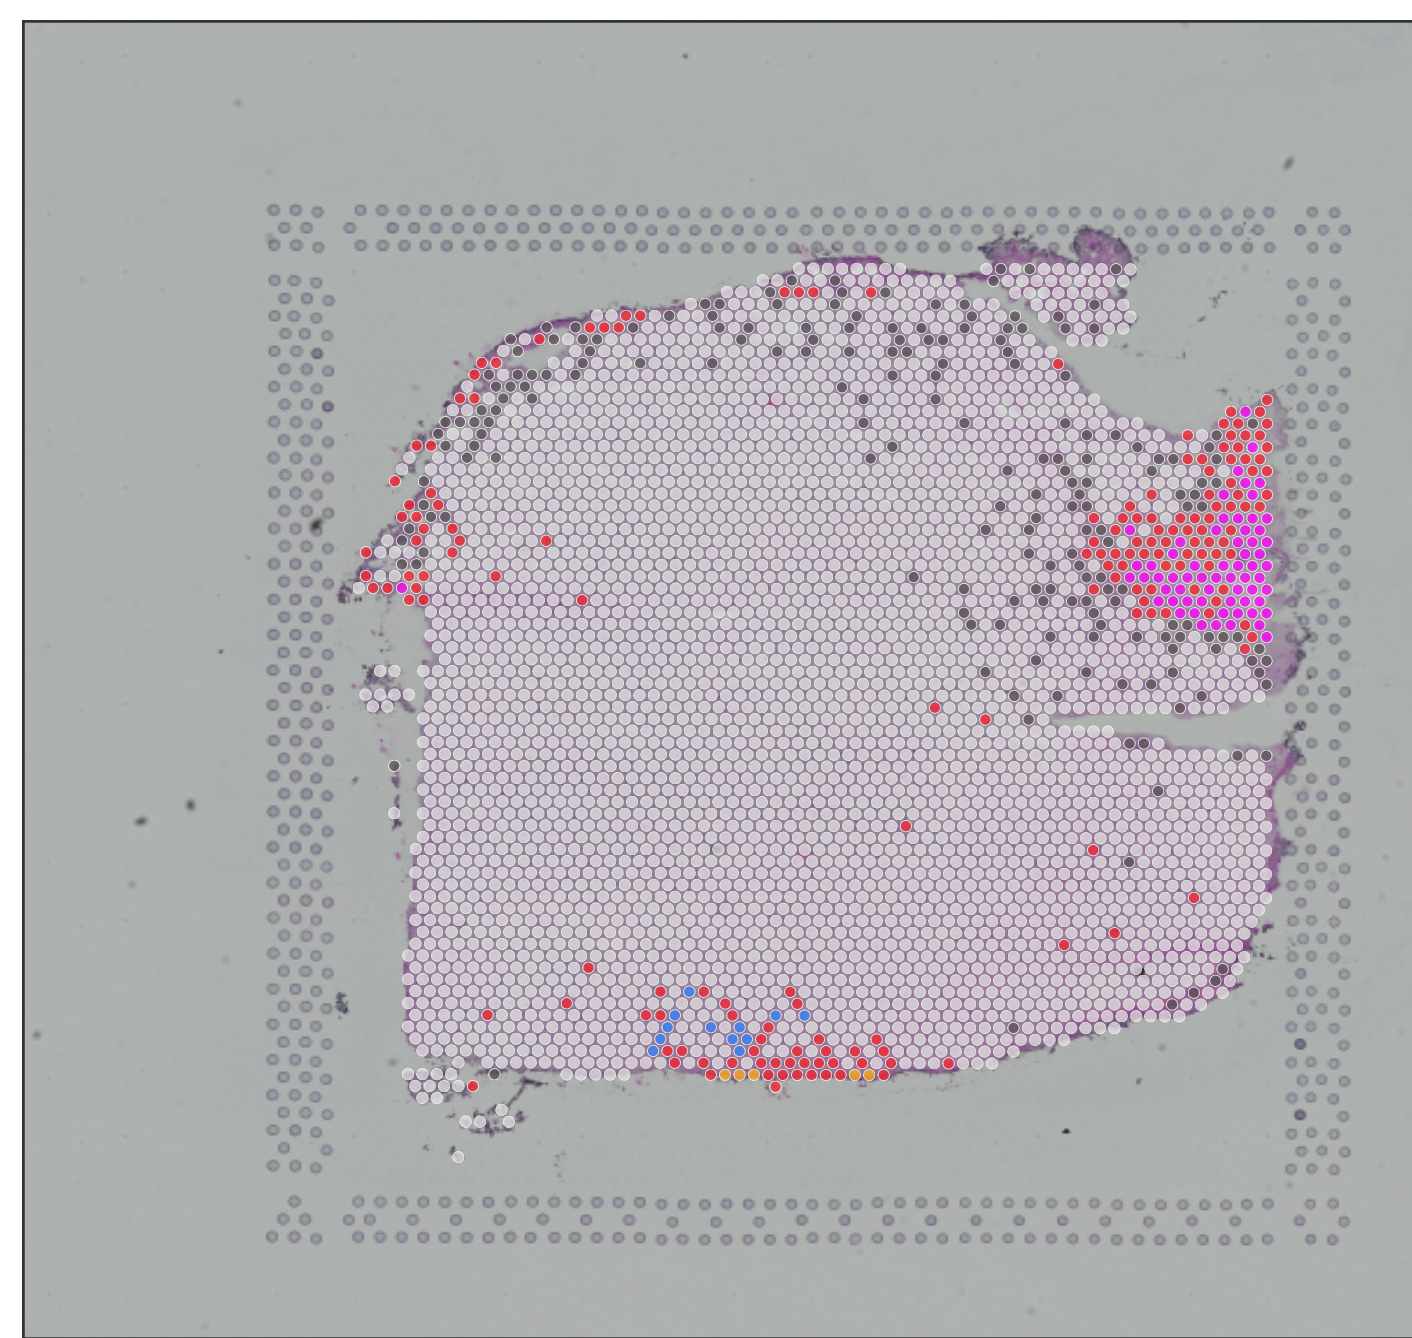

- 1
- 2
- 3
- 4
- 5
- 6
- 7

151670

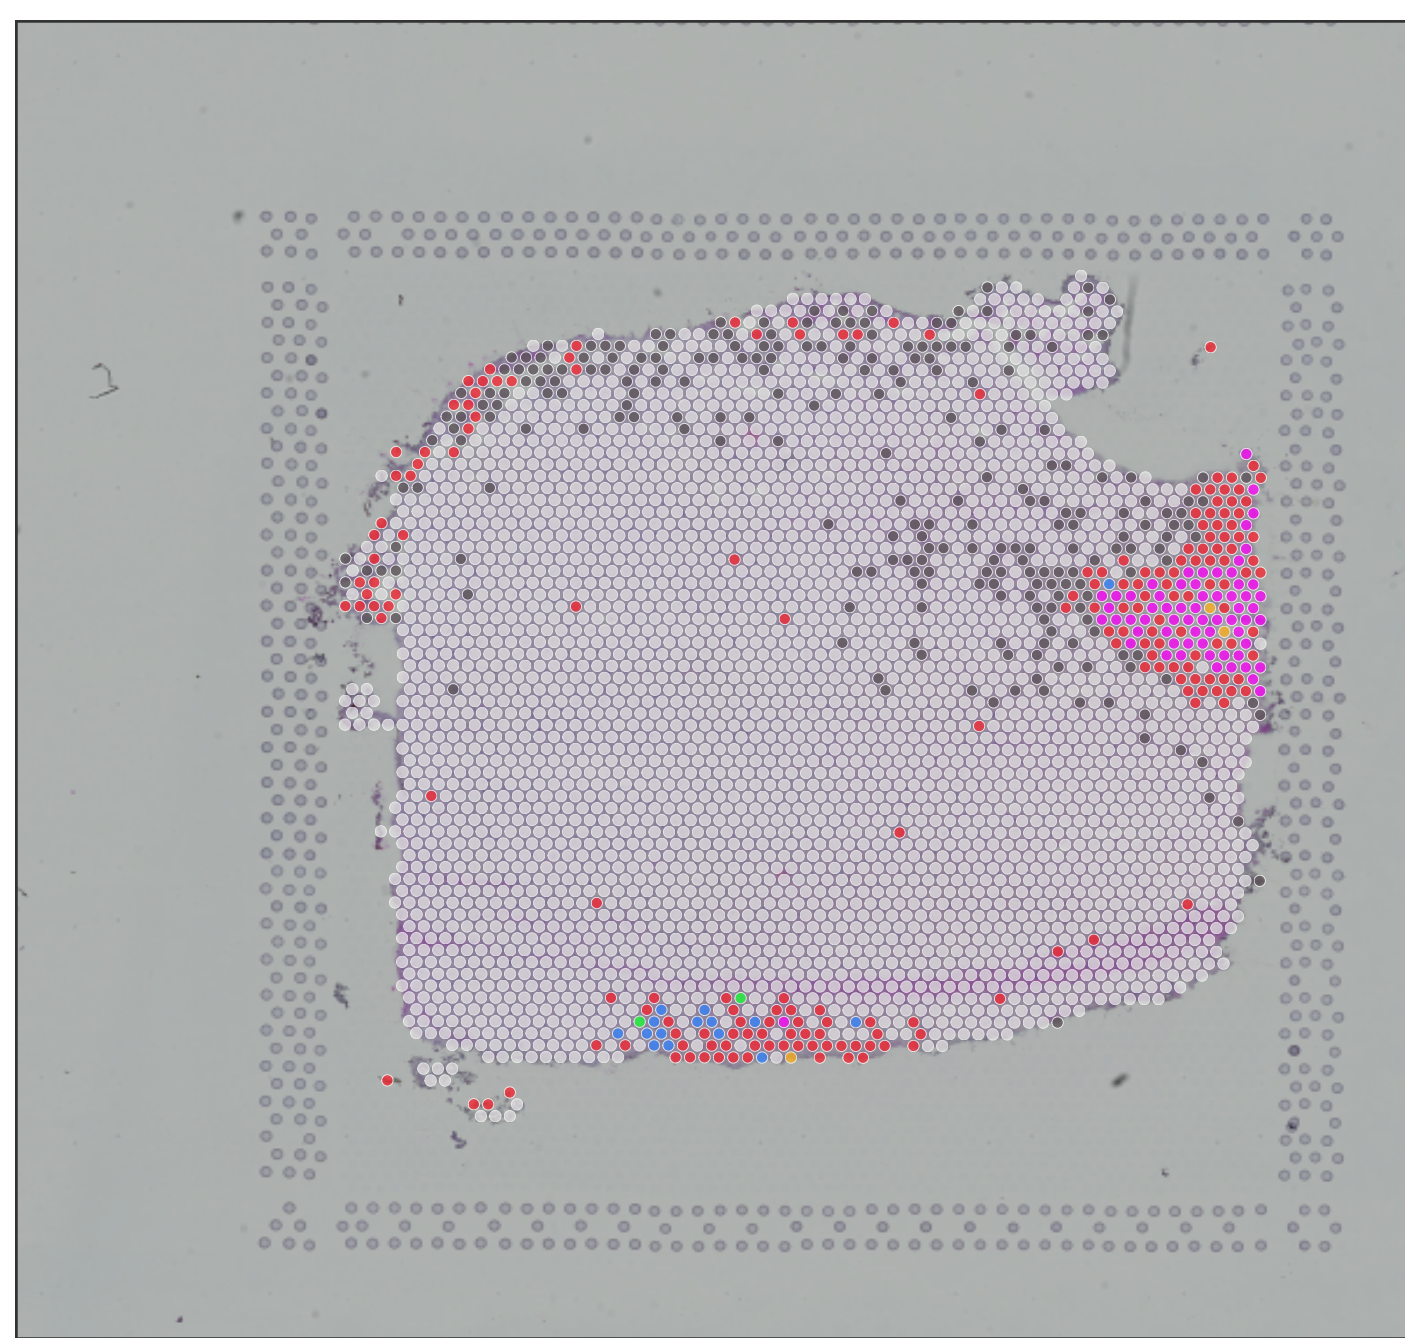

- 1
- 2
- 3
- 4
- 5
- 6
- 7

151671

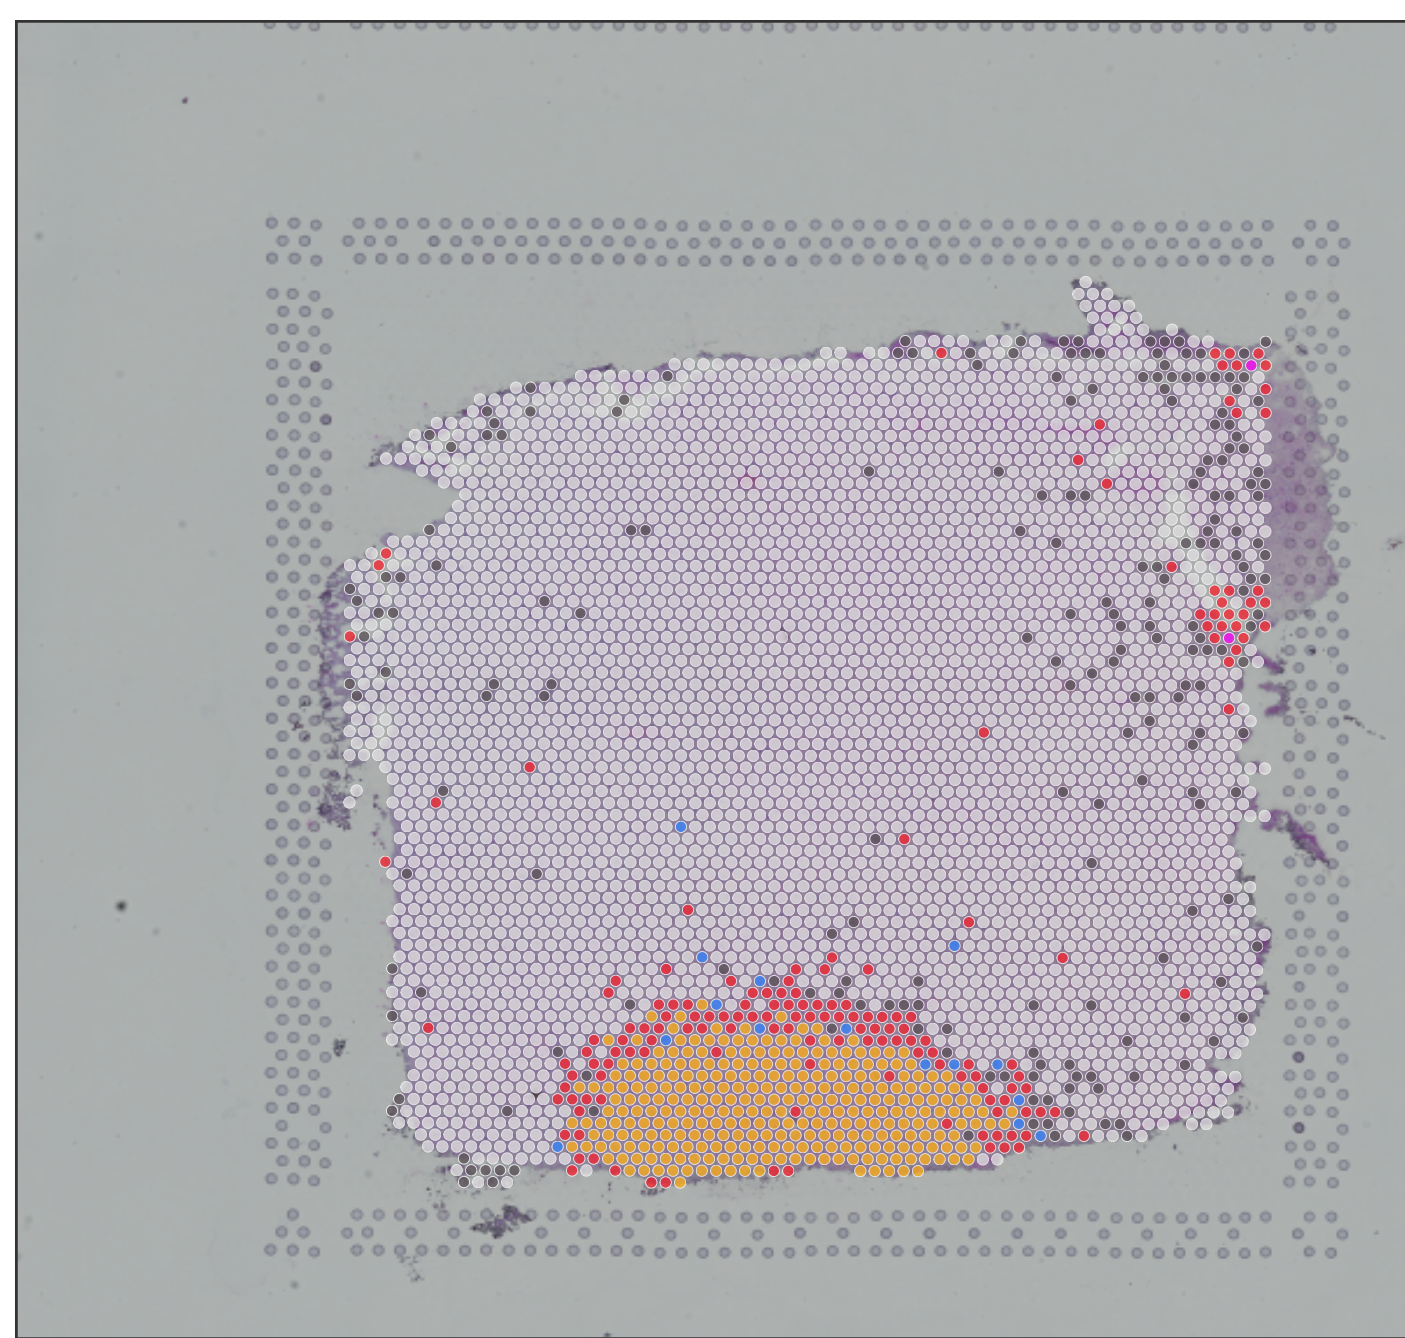

- 1
- 2
- 3
- 4
- 5
- 6
- 7

151672

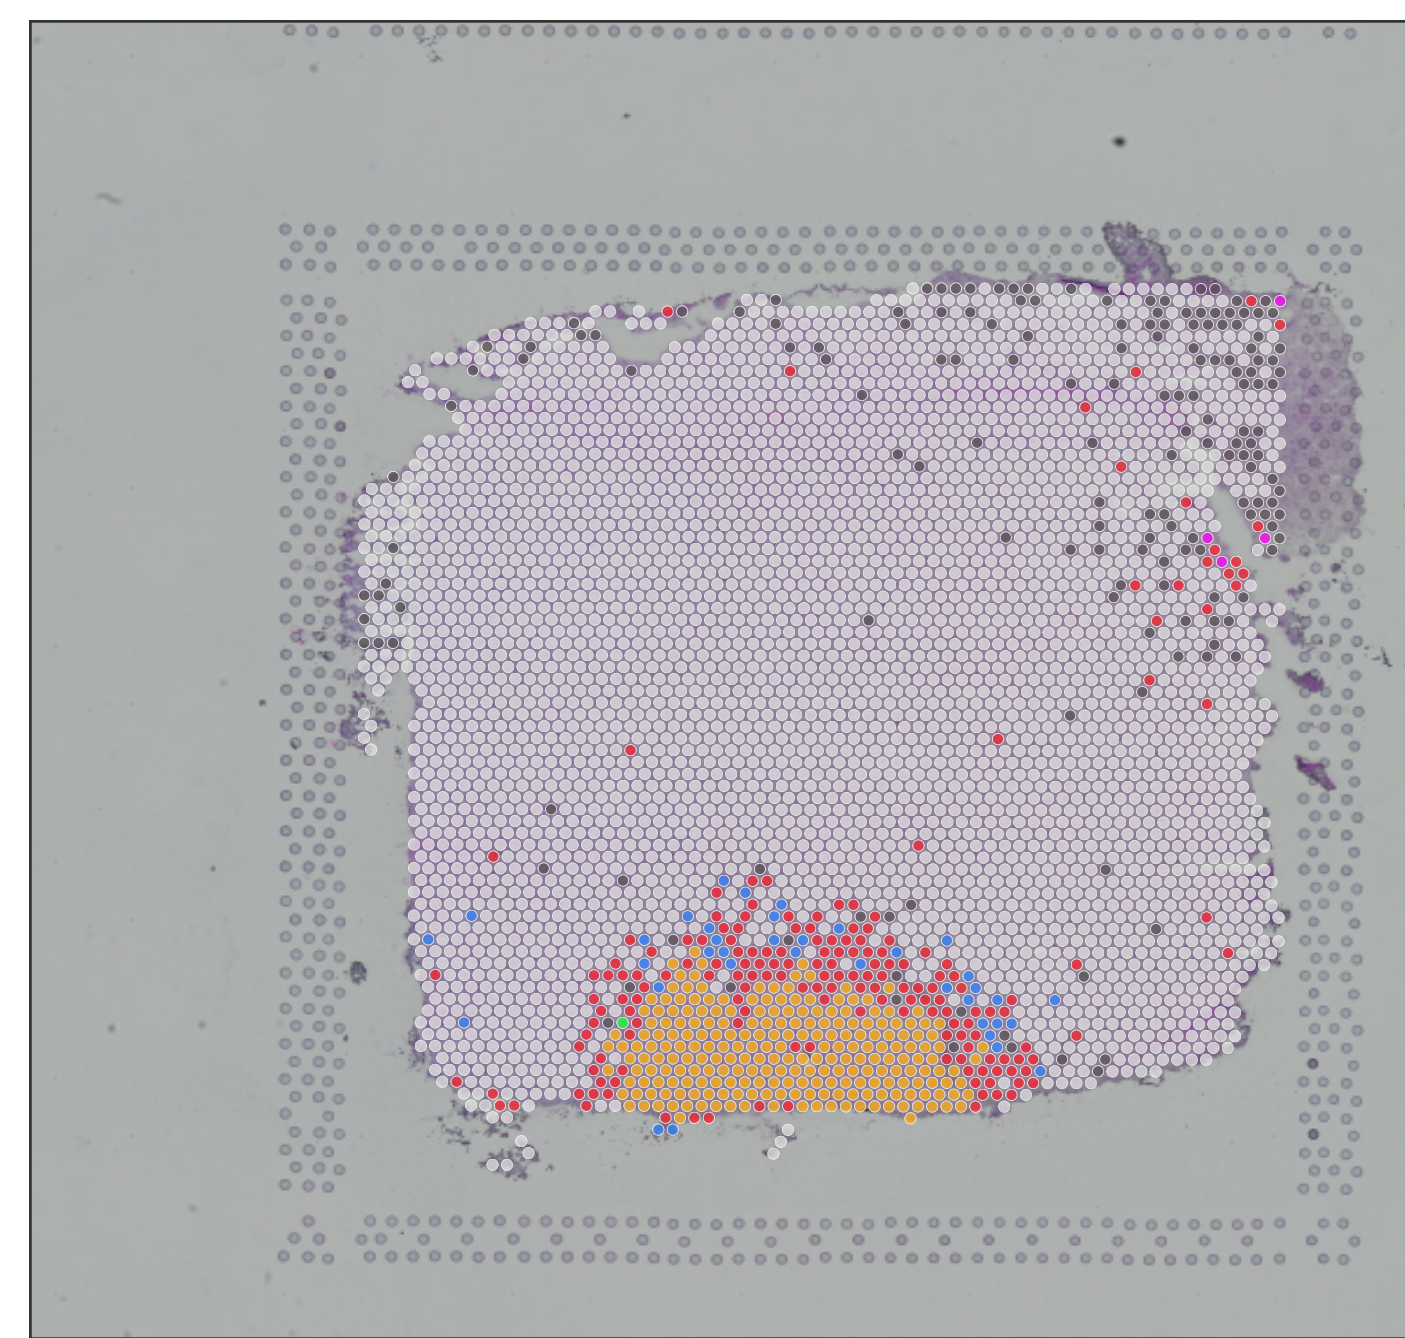

- 1
- 2
- 3
- 4
- 5
- 6
- 7

151673

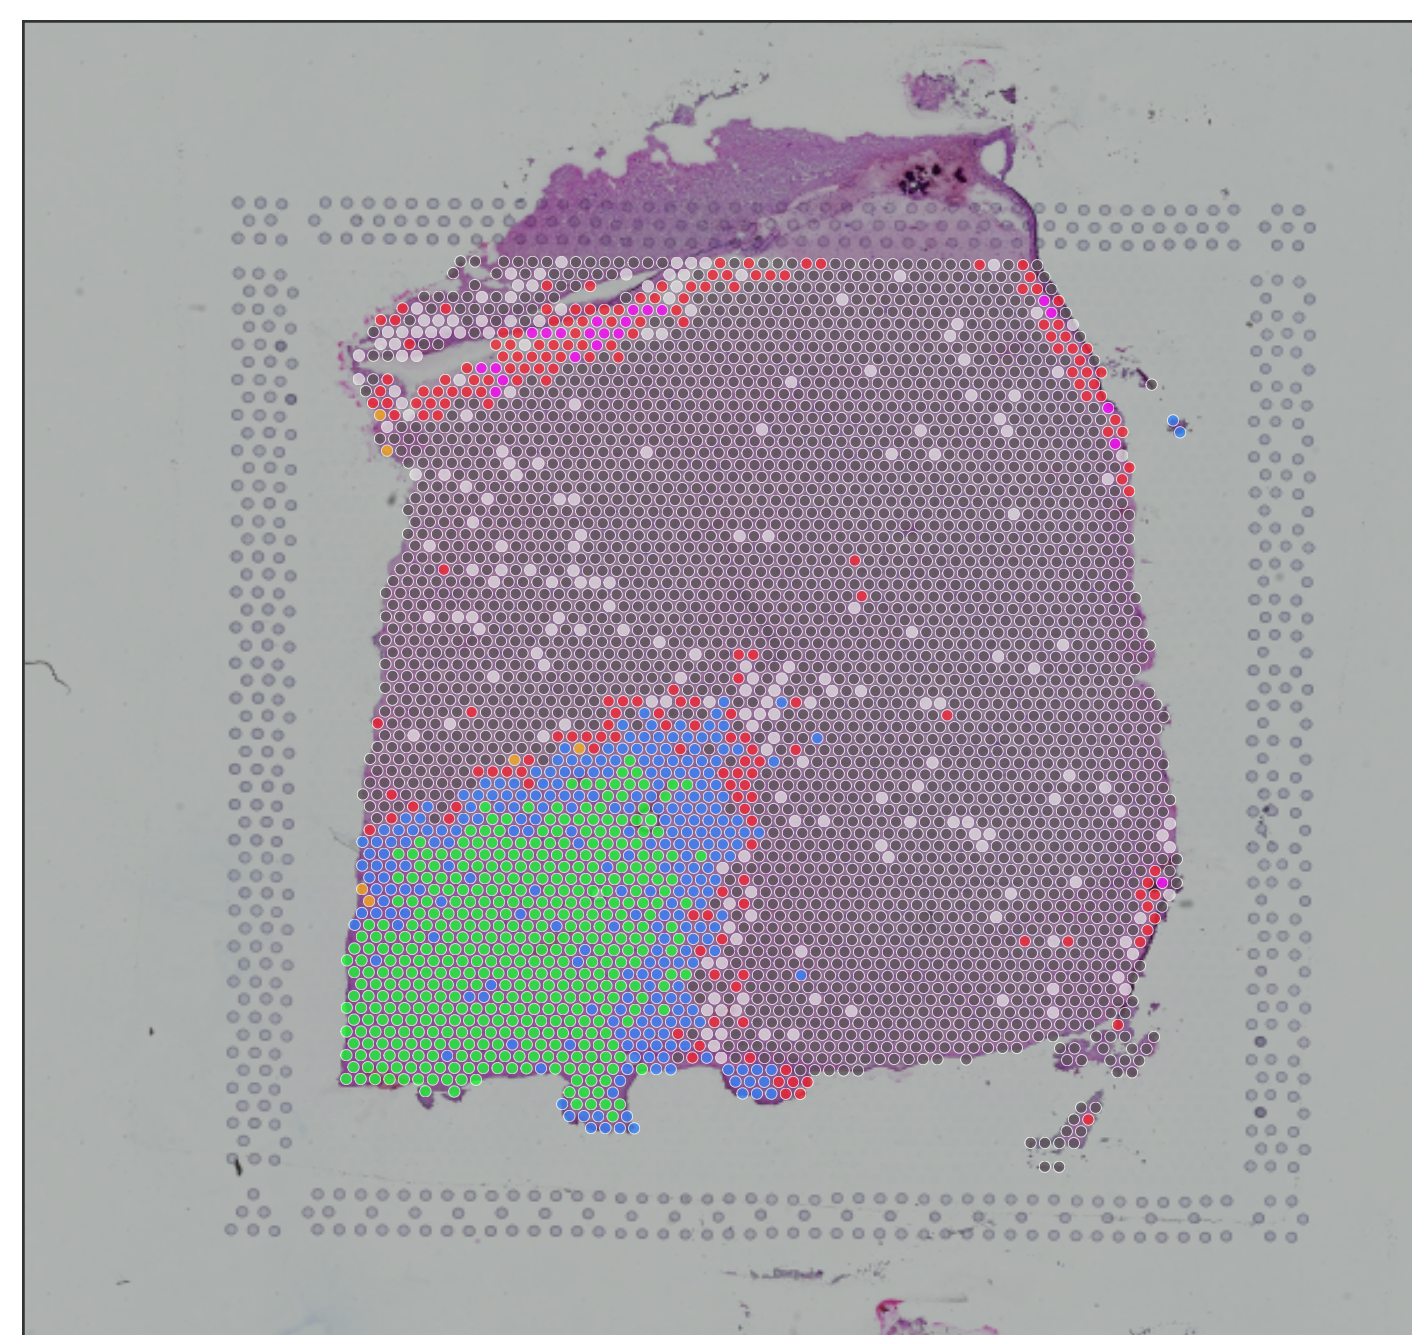

- 1
- 2
- 3
- 4
- 5
- 6
- 7

151674

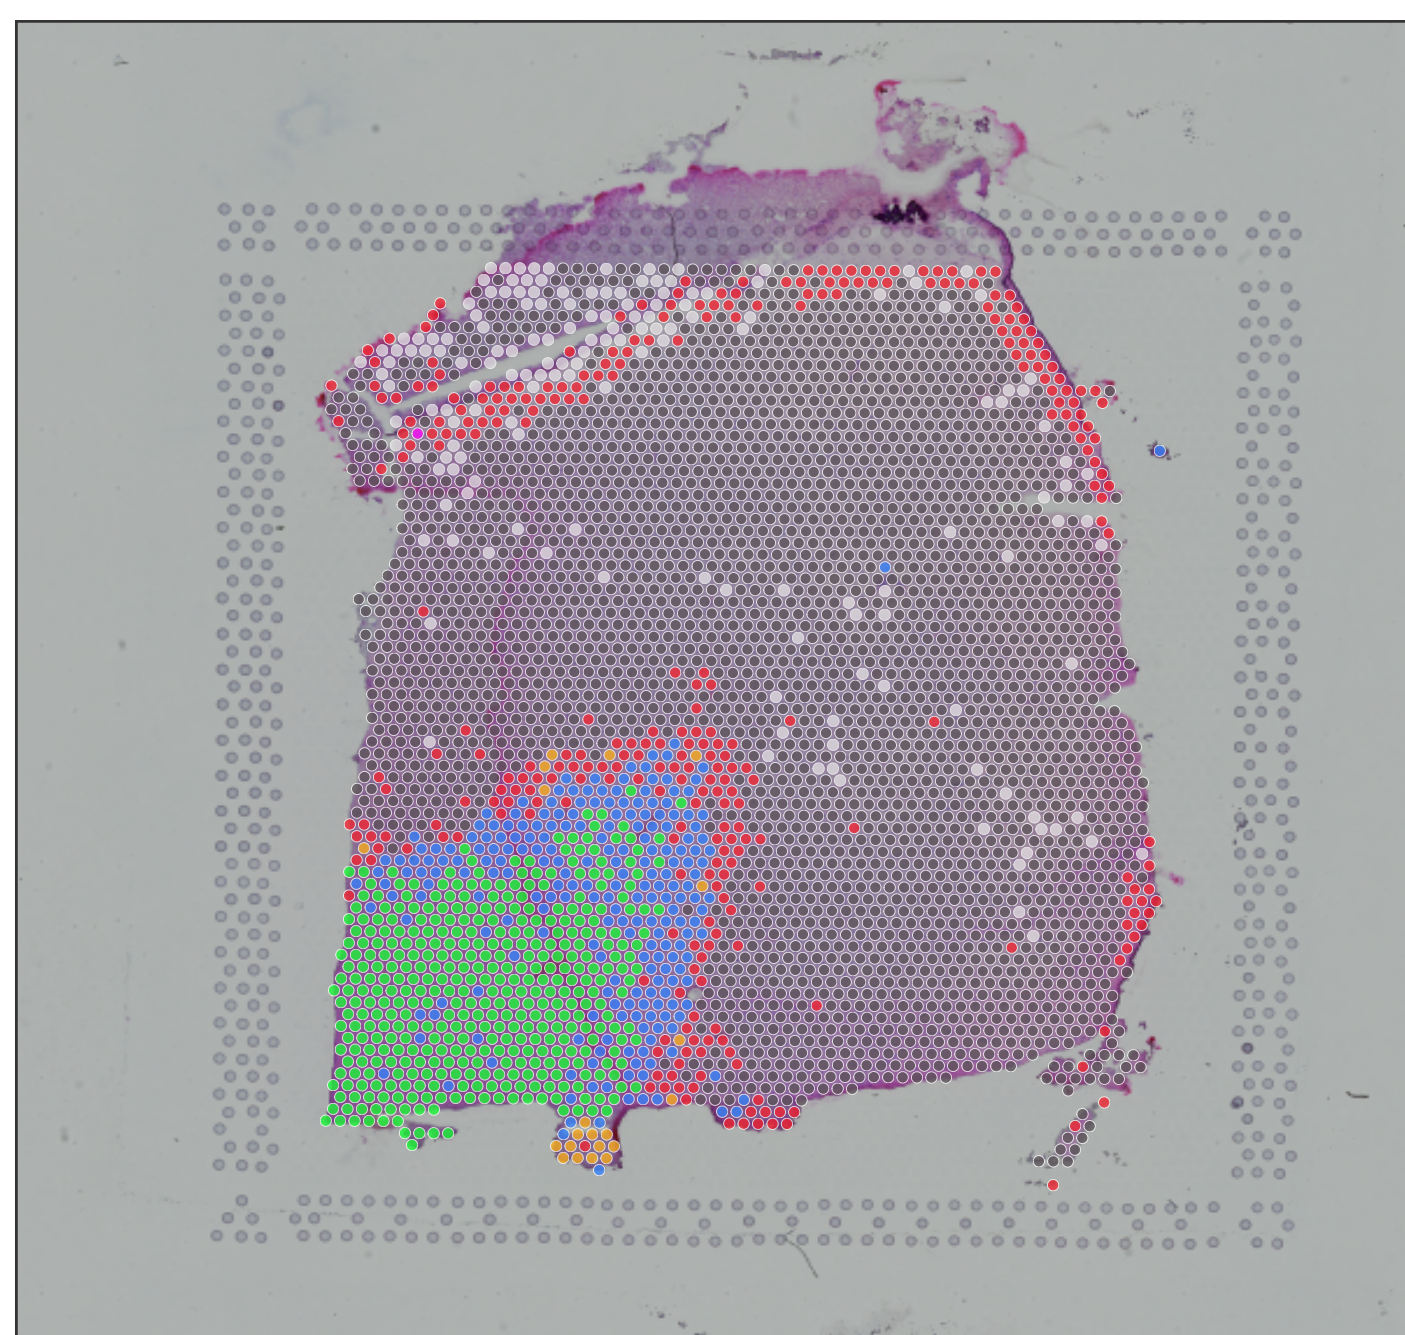

- 1
- 2
- 3
- 4
- 5
- 6
- 7

151675

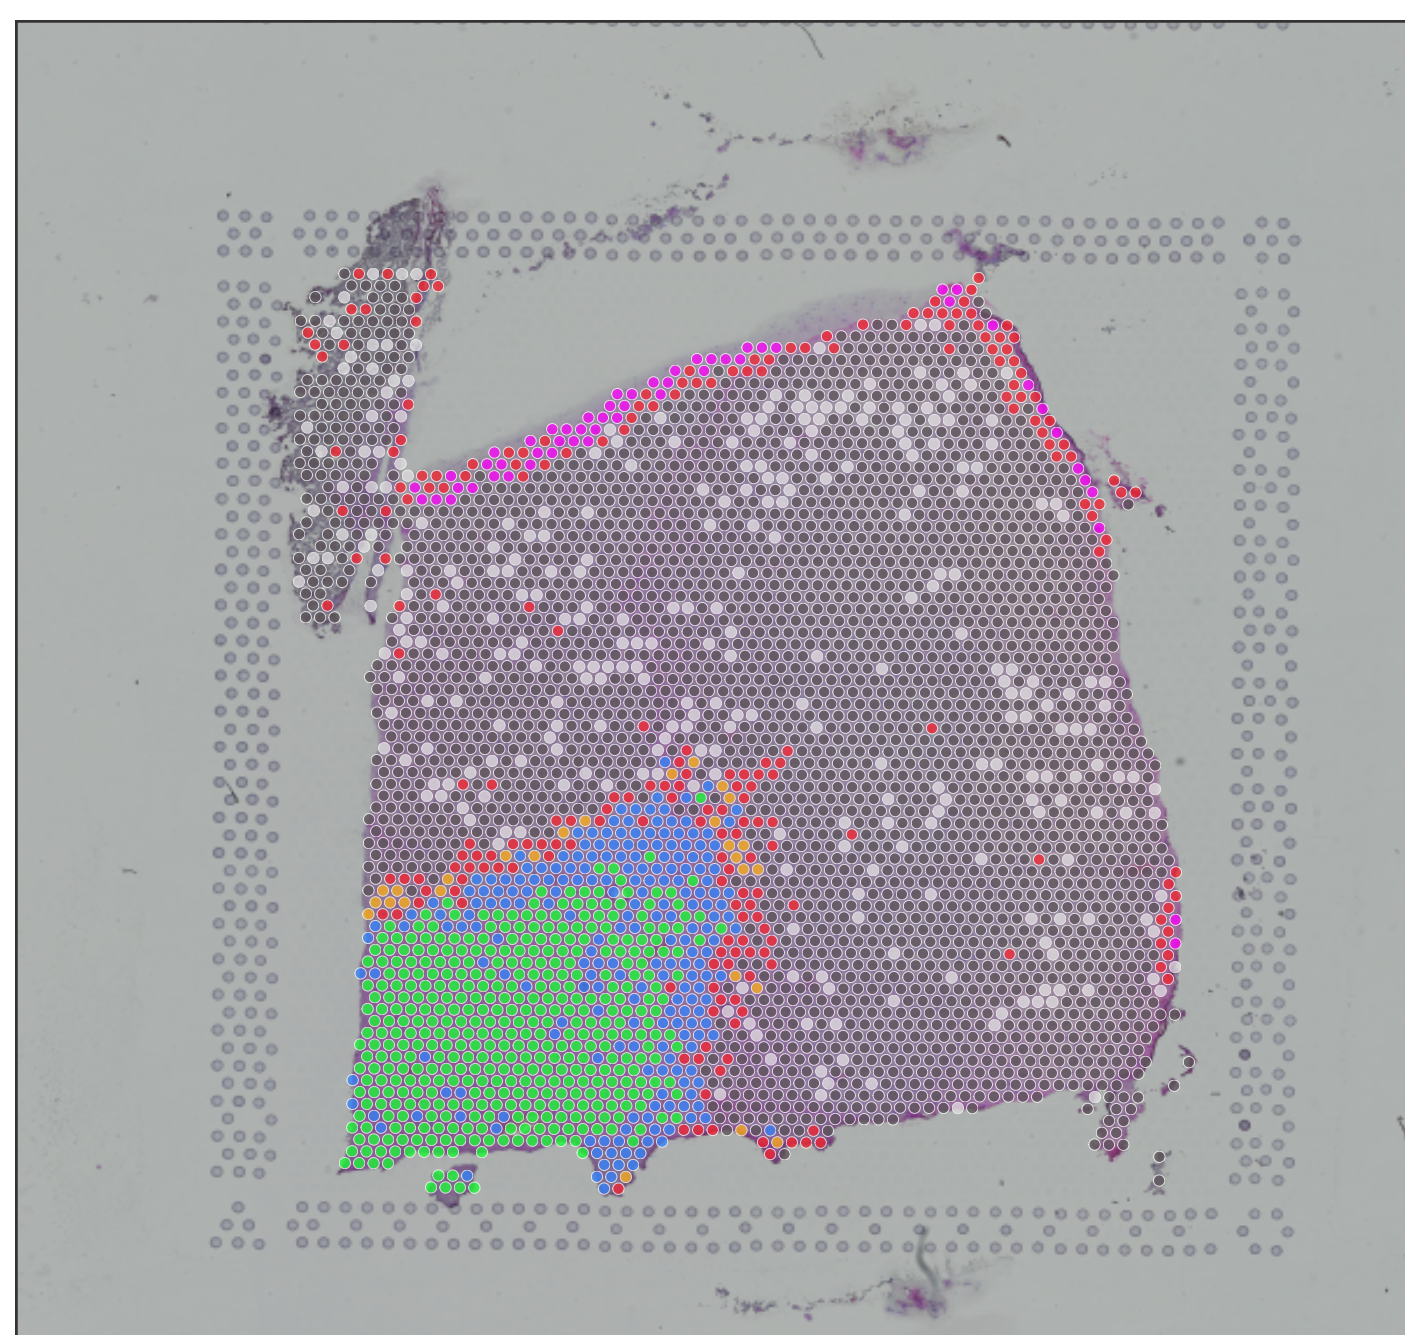

- 1
- 2
- 3
- 4
- 5
- 6
- 7

151676

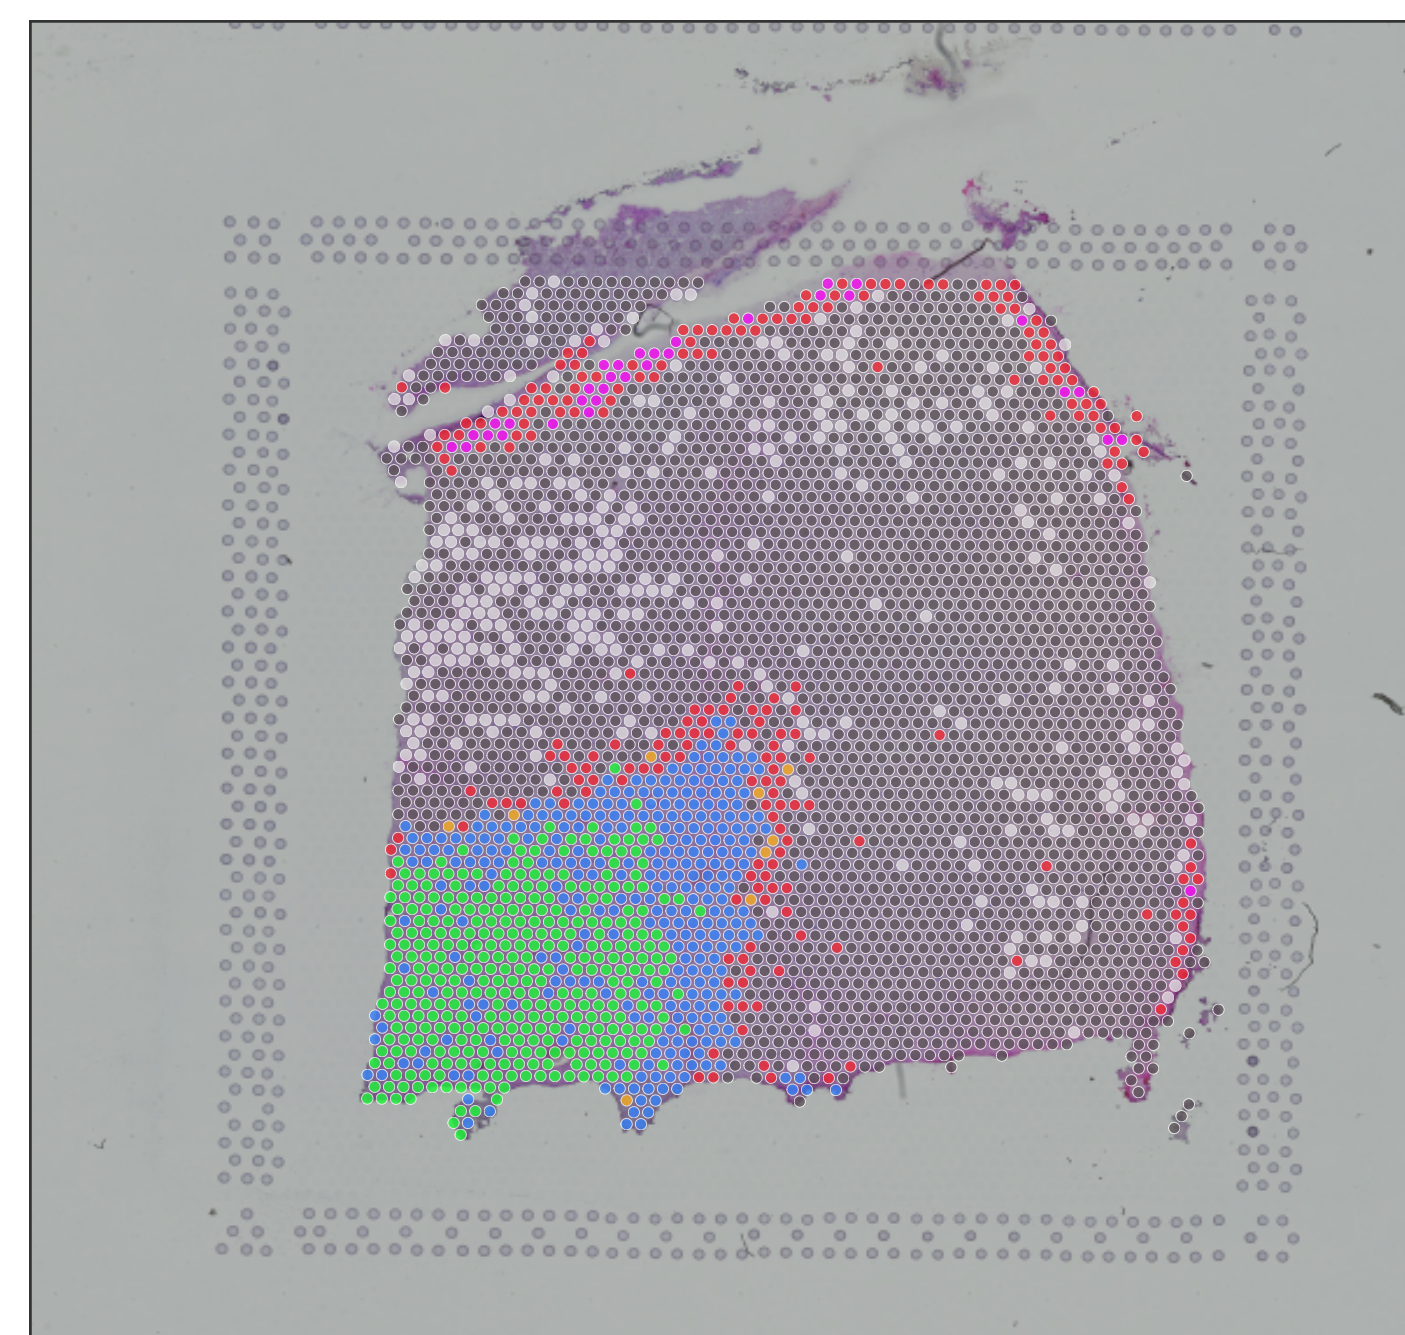

- 1
- 2
- 3
- 4
- 5
- 6
- 7



151507 expr\_chrM\_ratio

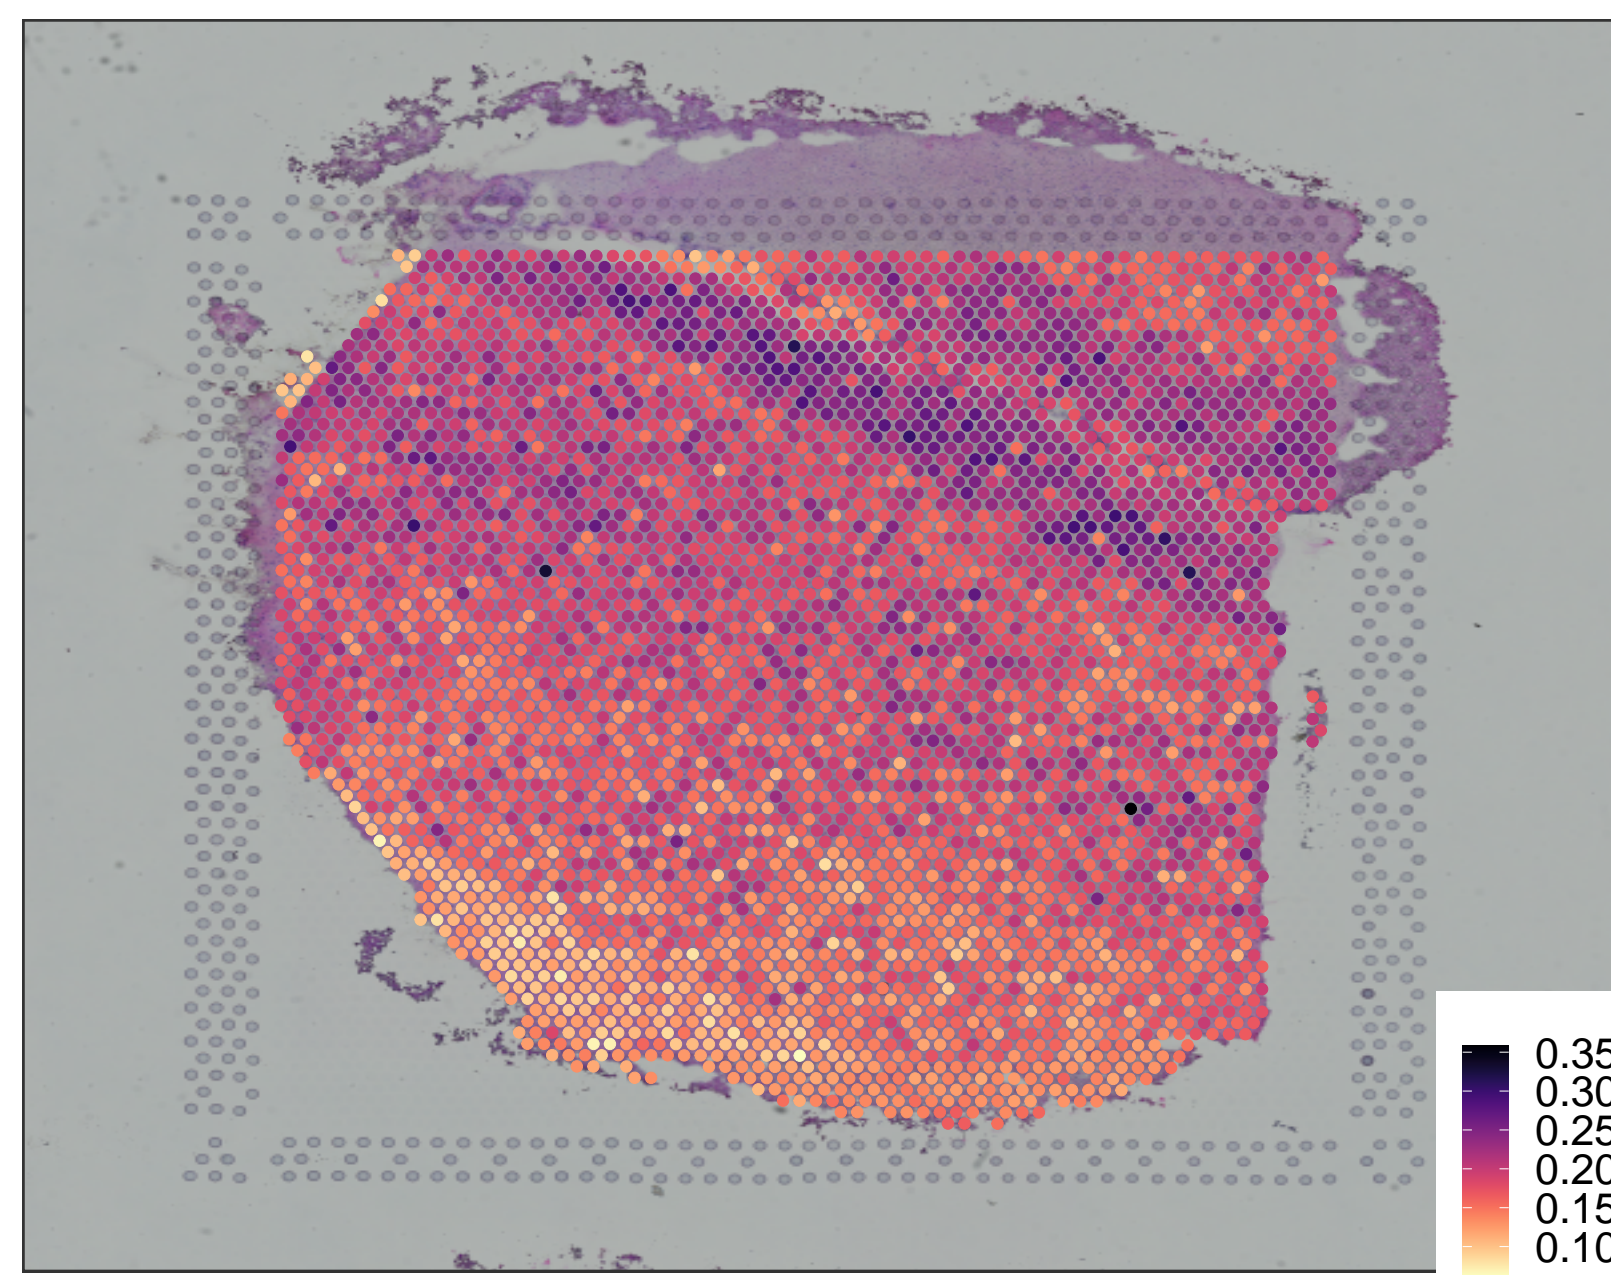

min &gt; -1

151508 expr\_chrM\_ratio

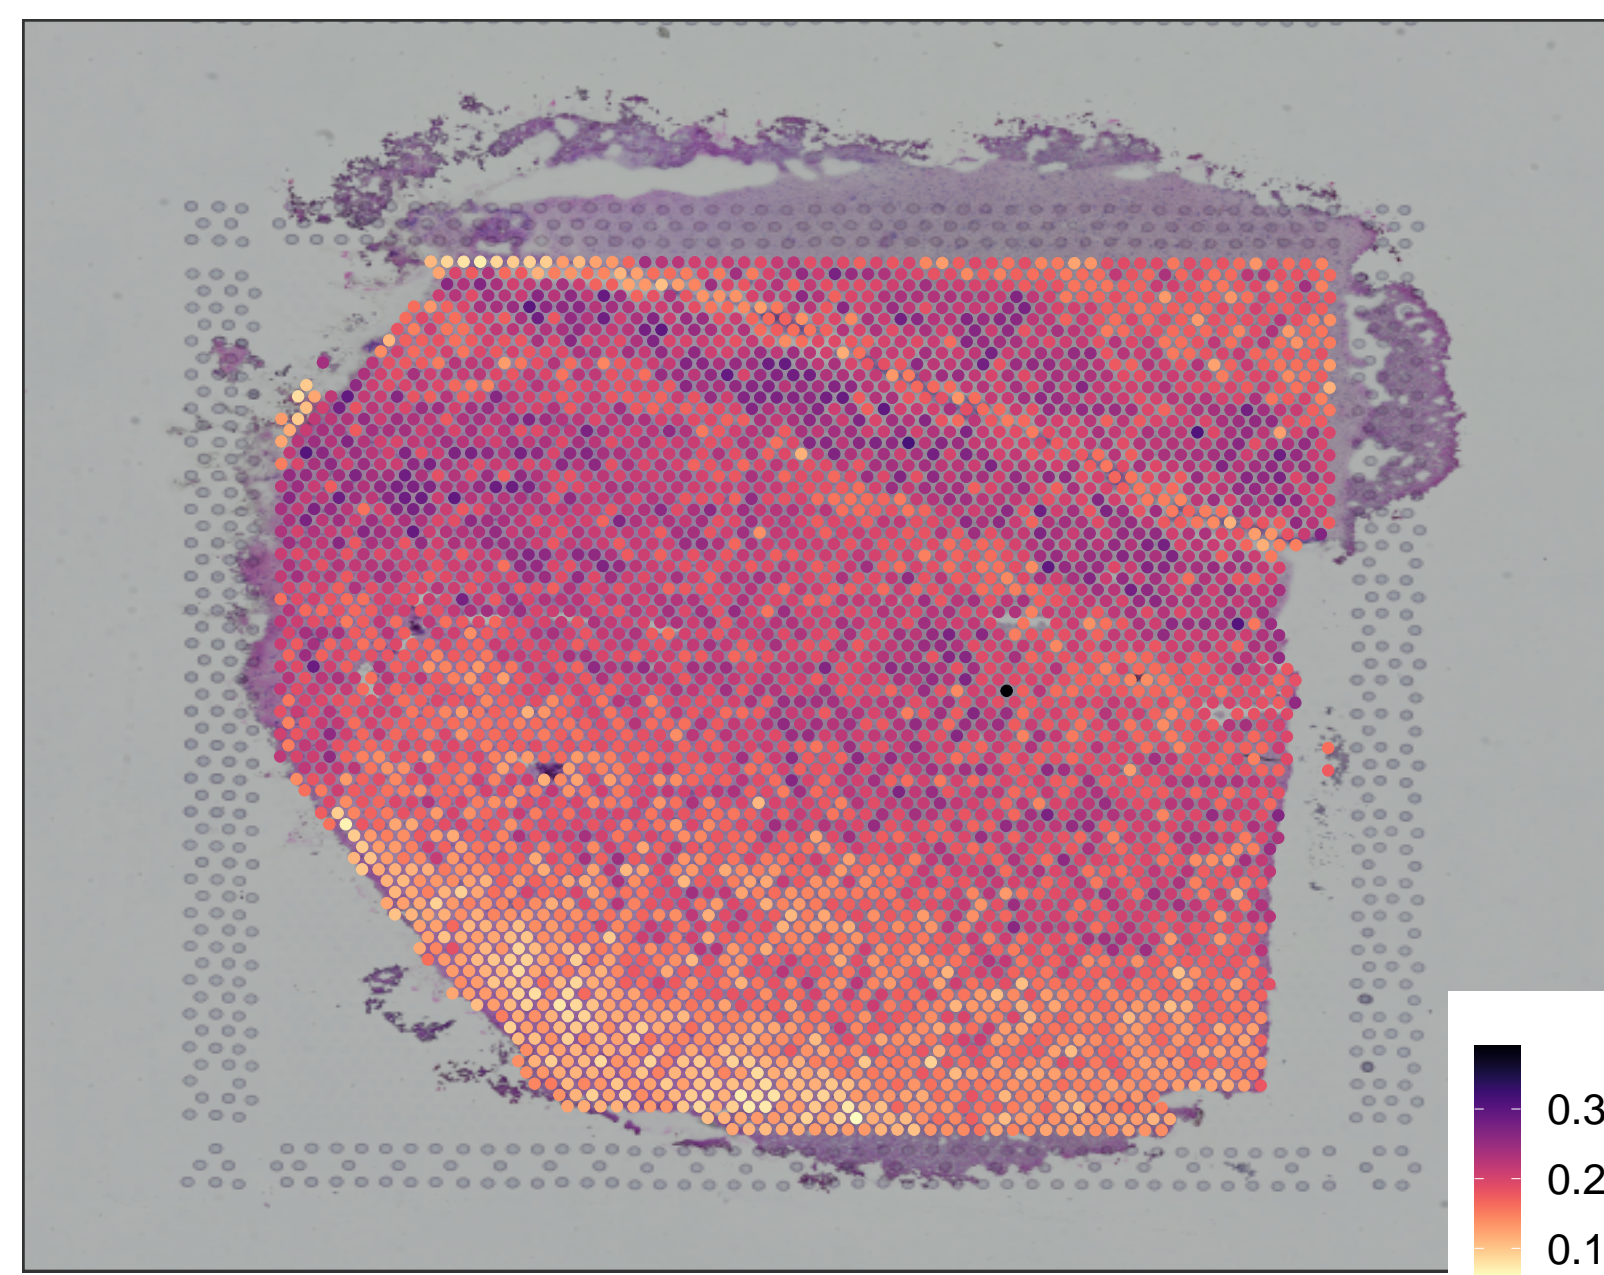

min &gt; -1

151509 expr\_chrM\_ratio

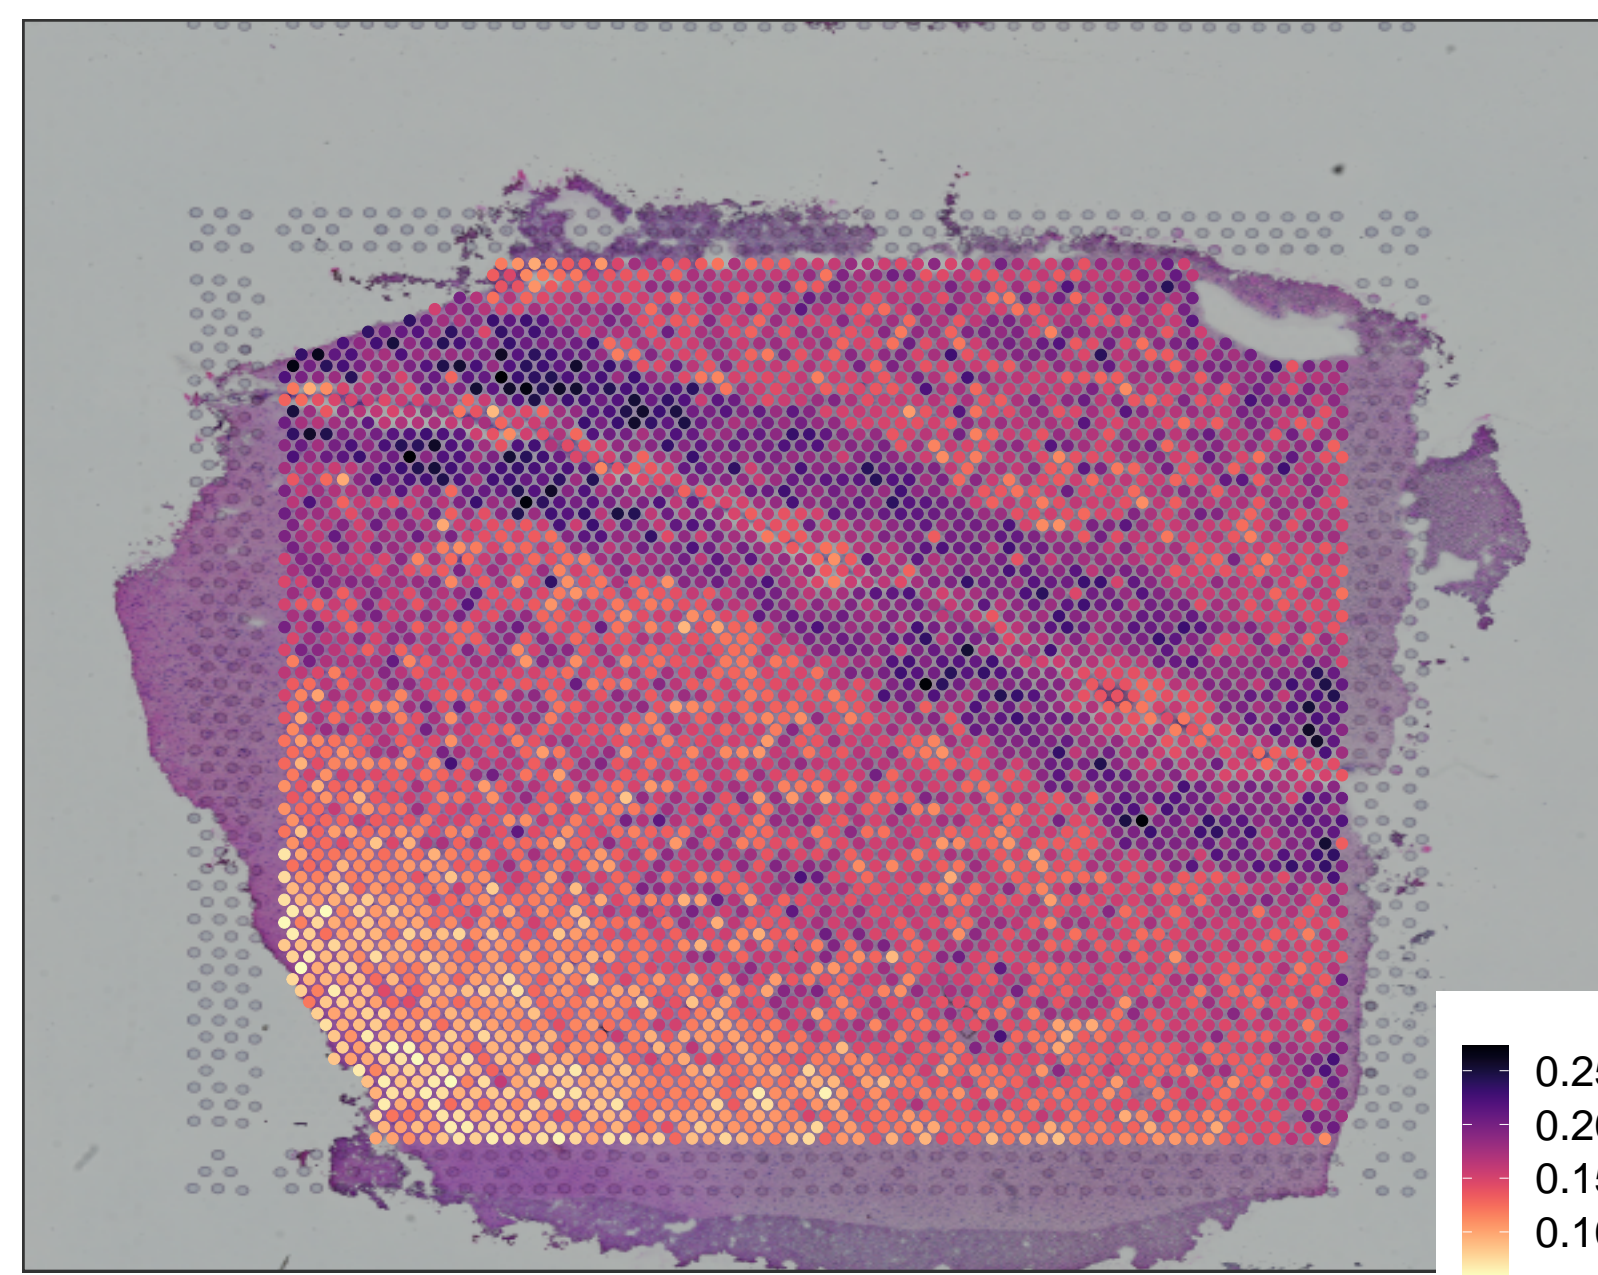

min &gt; -1

151510 expr\_chrM\_ratio

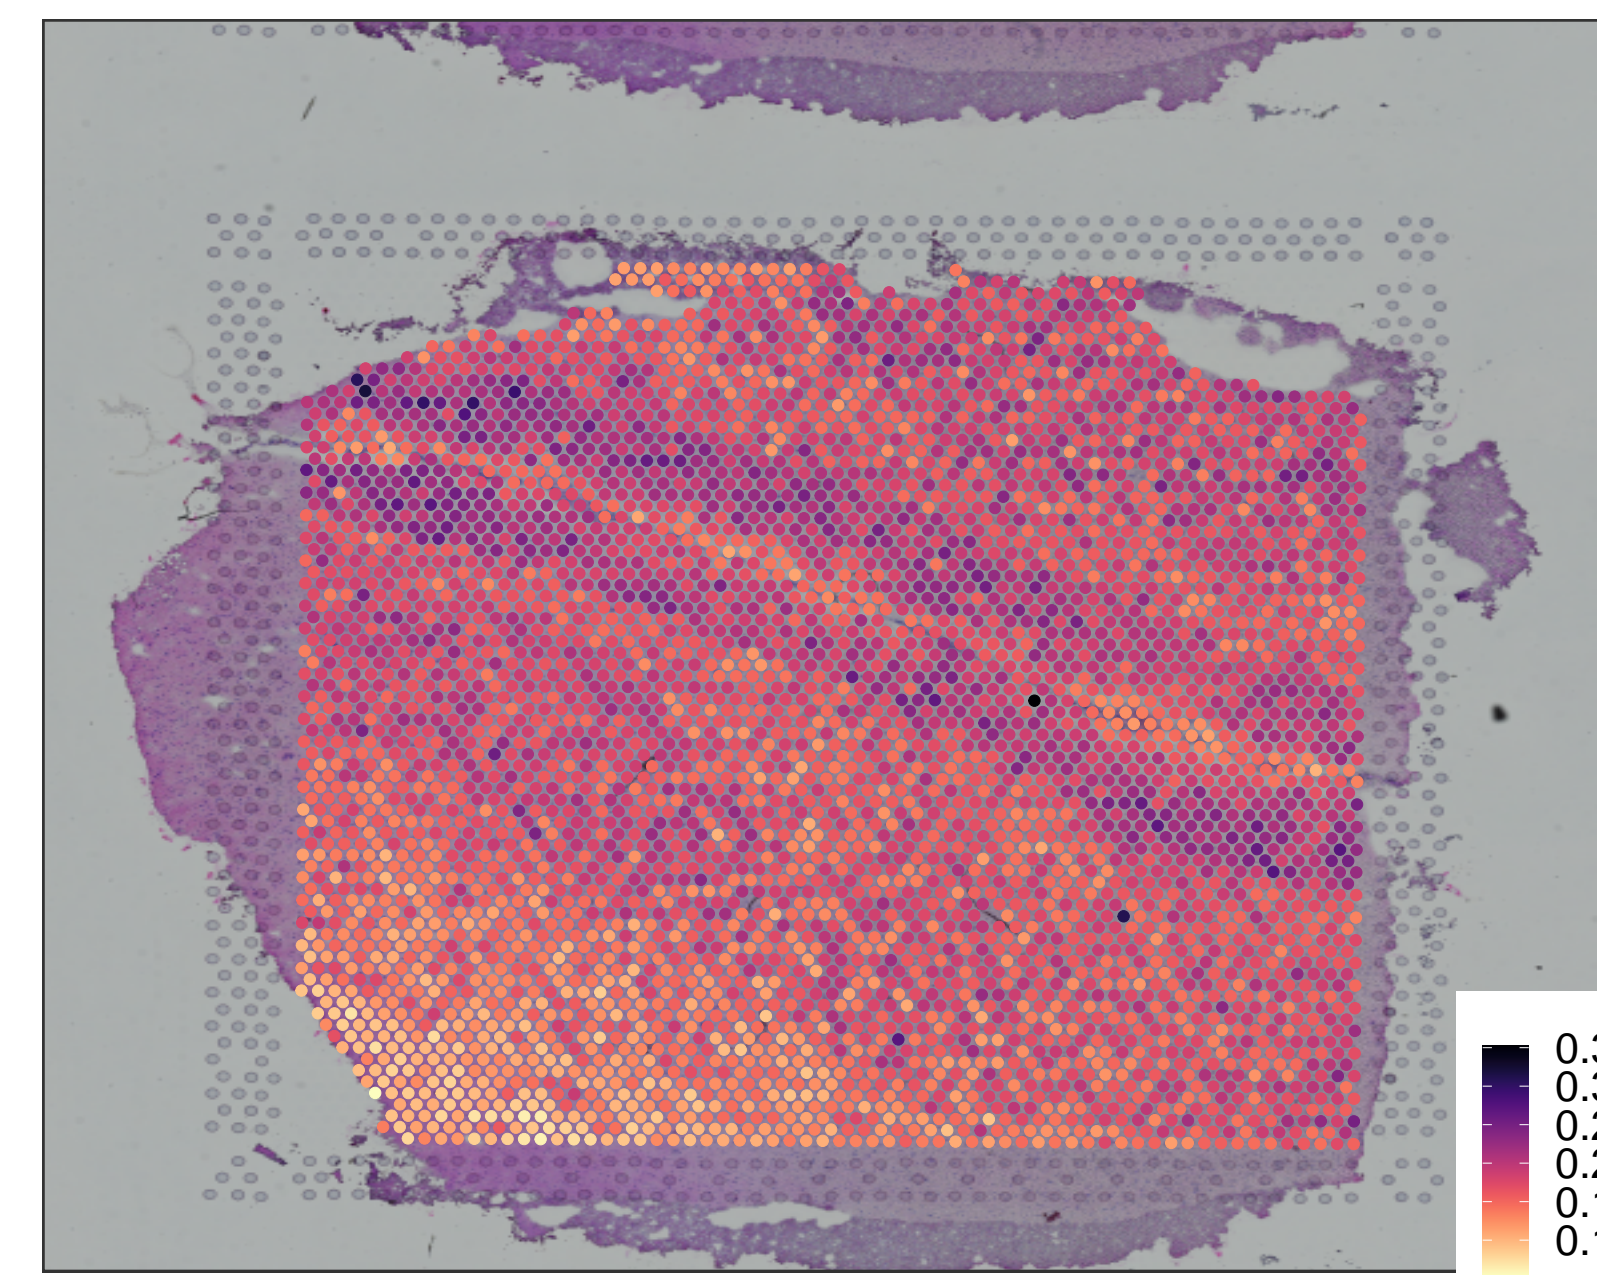

min &gt; -1

151669 expr\_chrM\_ratio

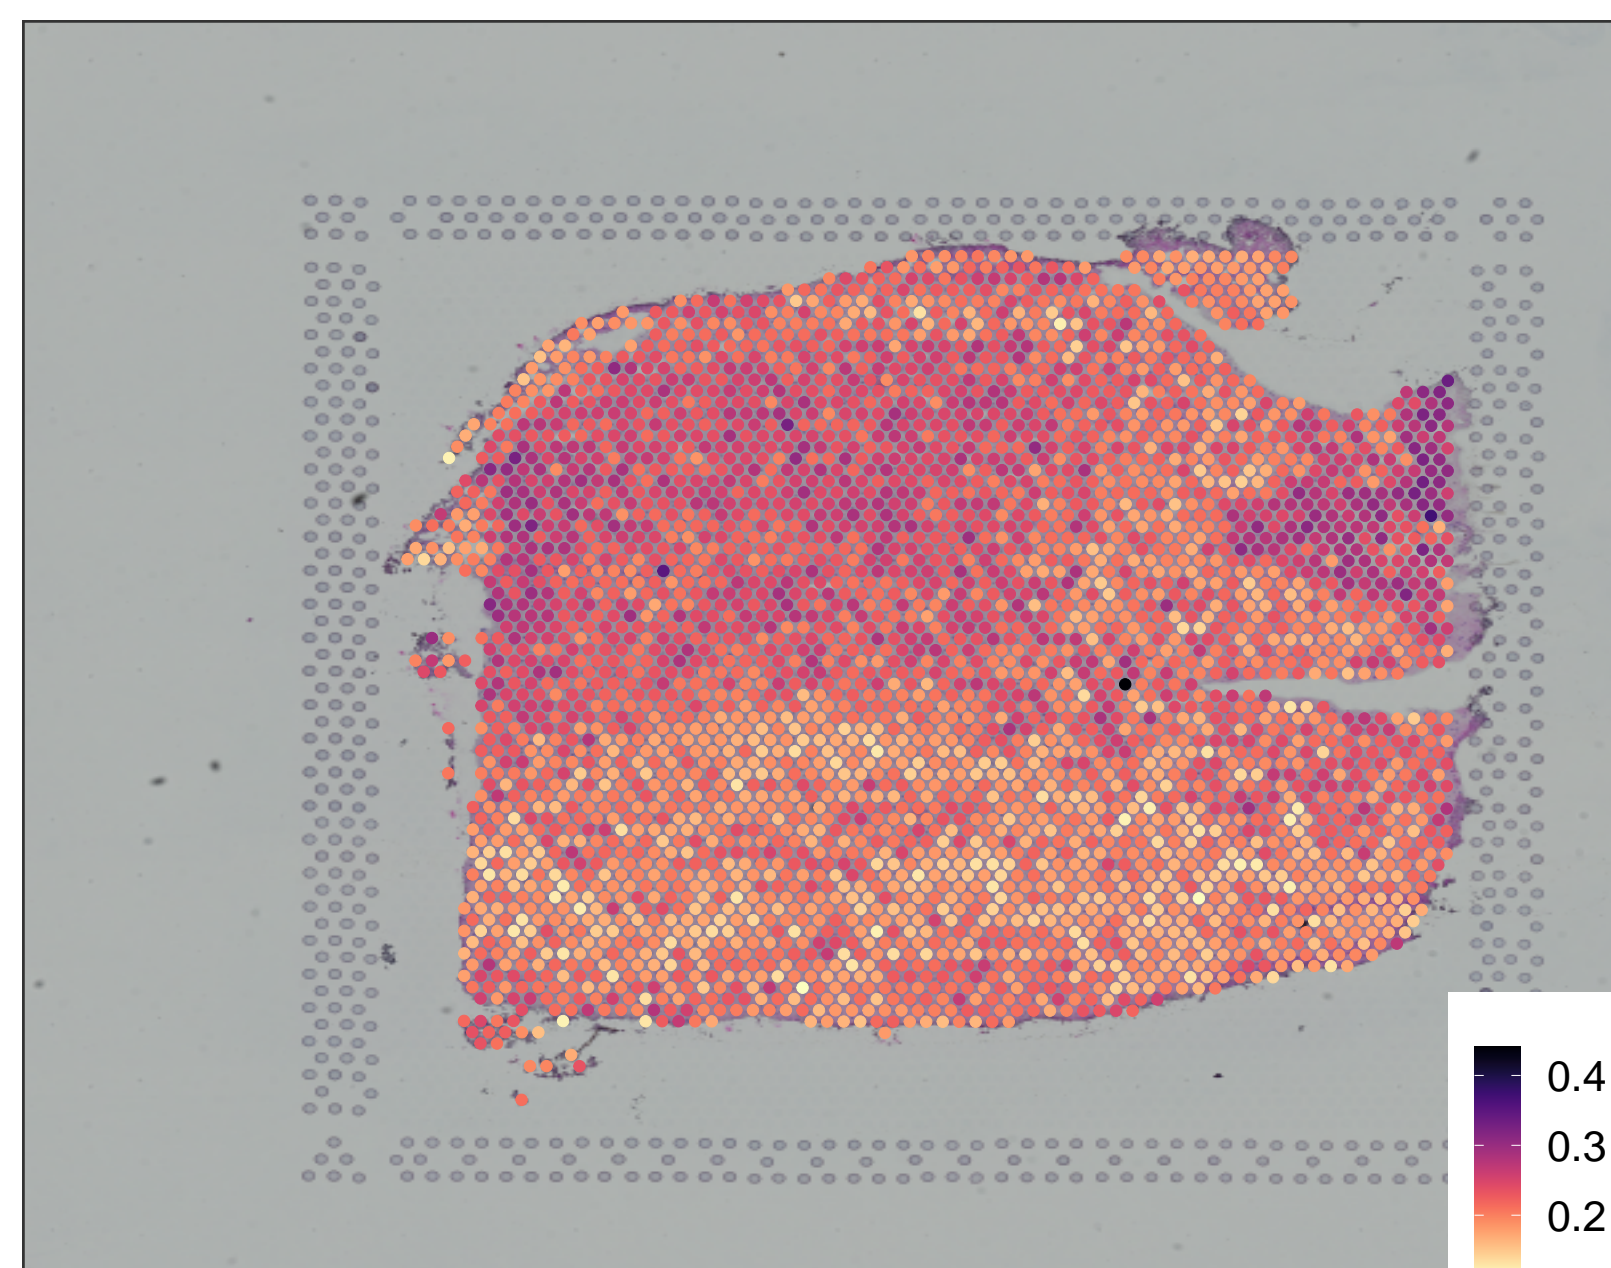

min &gt; -1

151670 expr\_chrM\_ratio

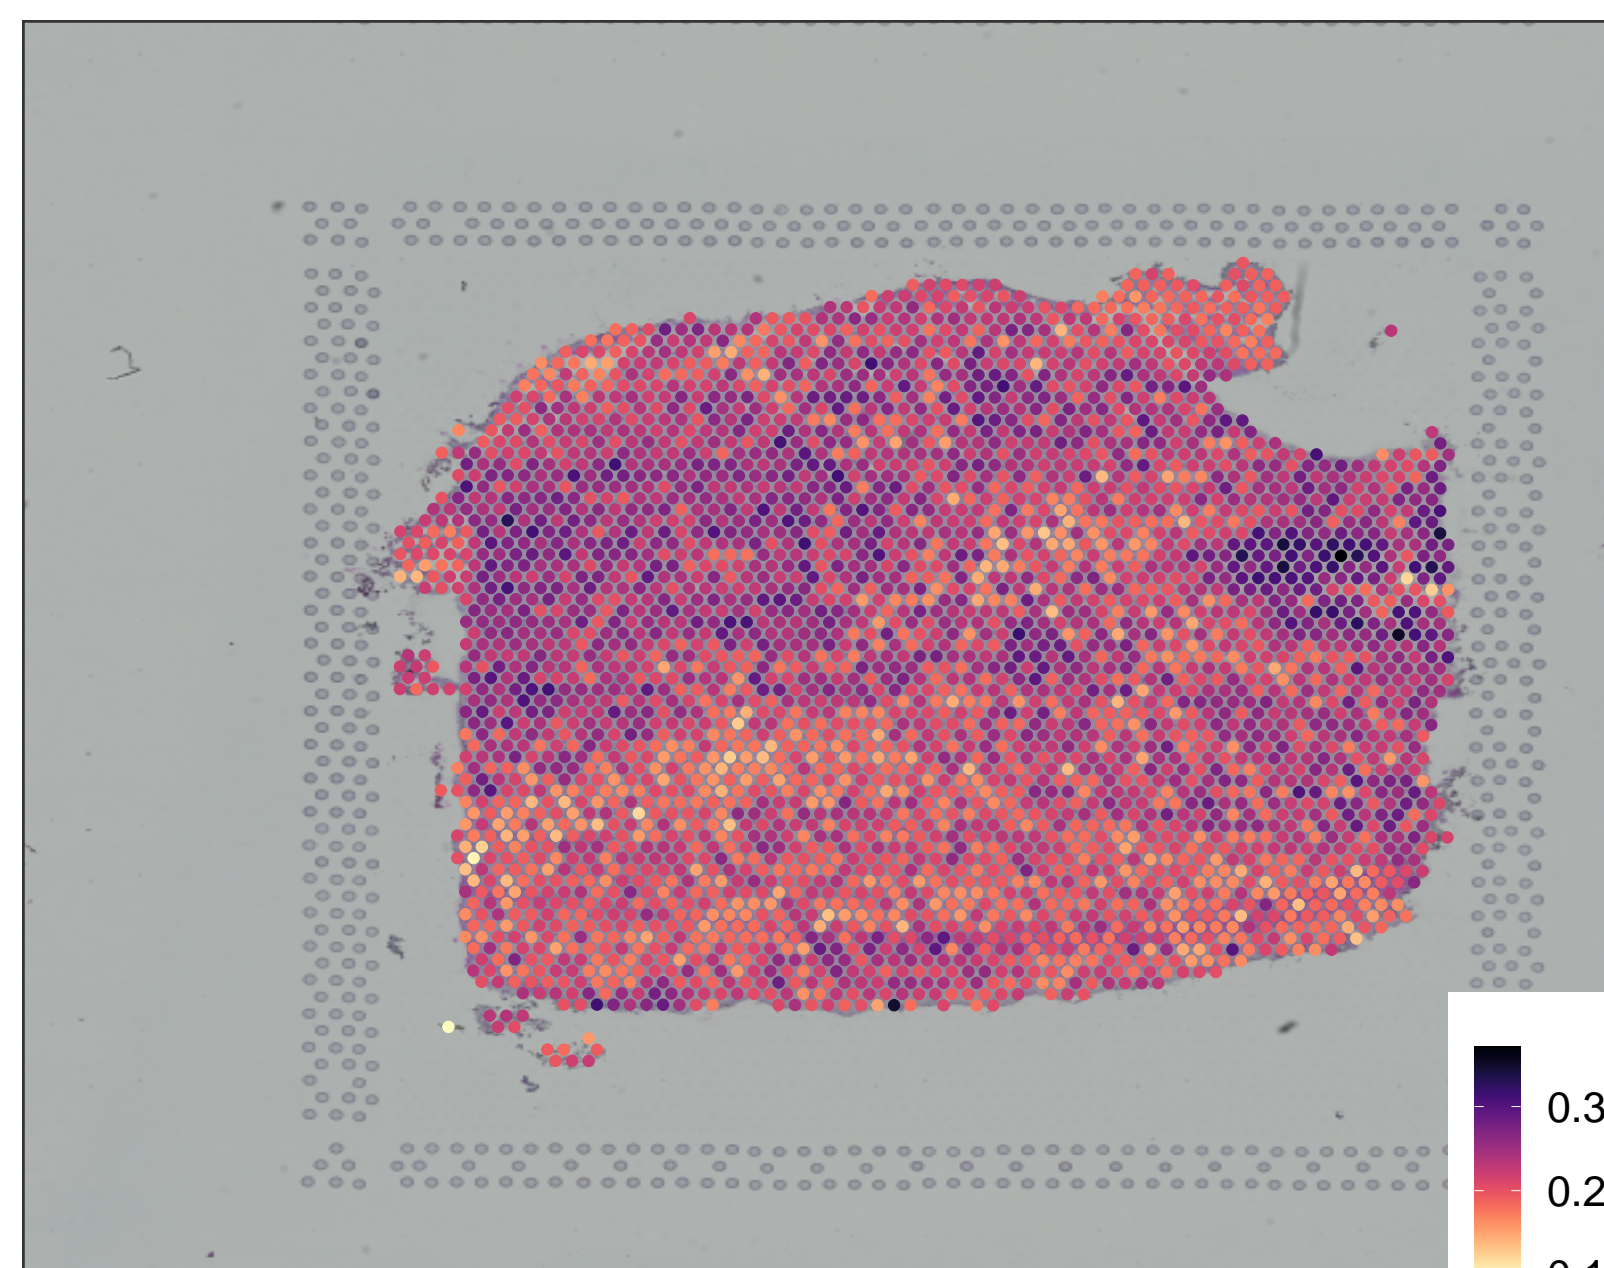

min &gt; -1

151671 expr\_chrM\_ratio

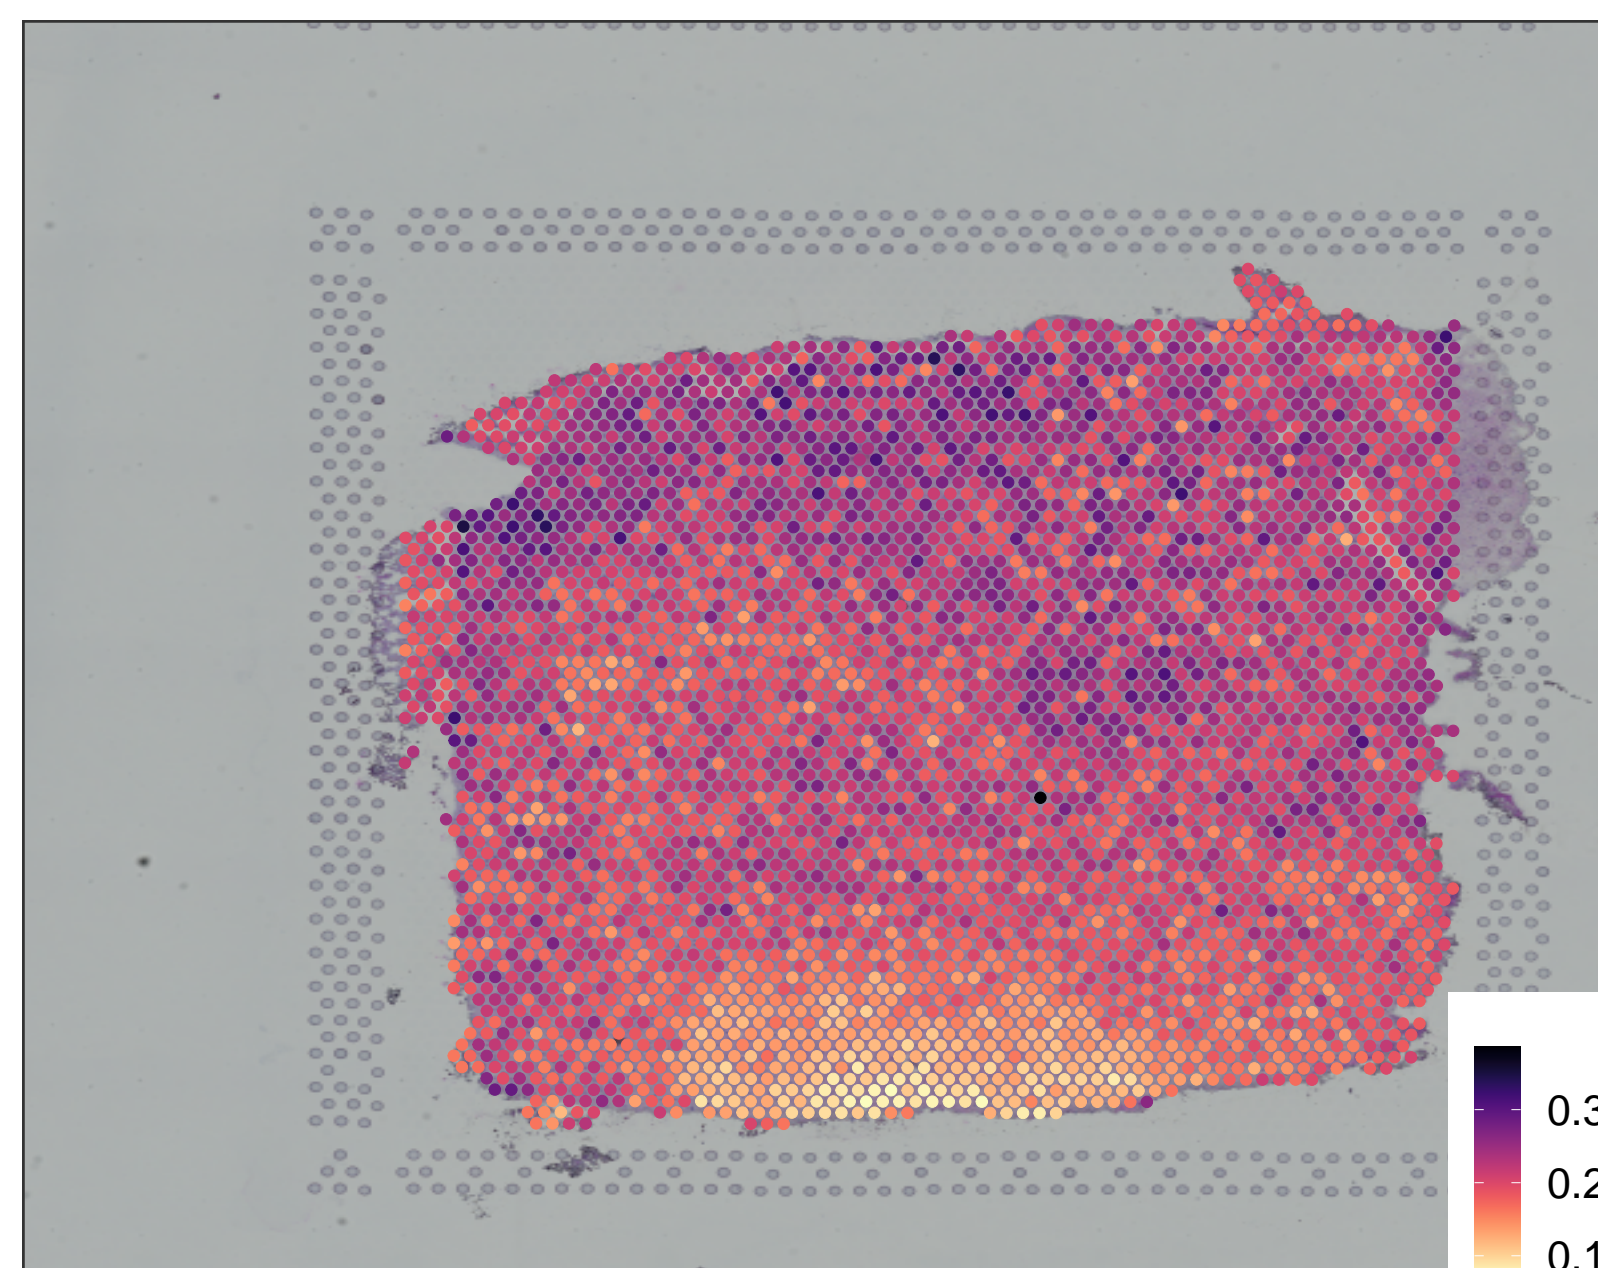

min &gt; -1

151672 expr\_chrM\_ratio

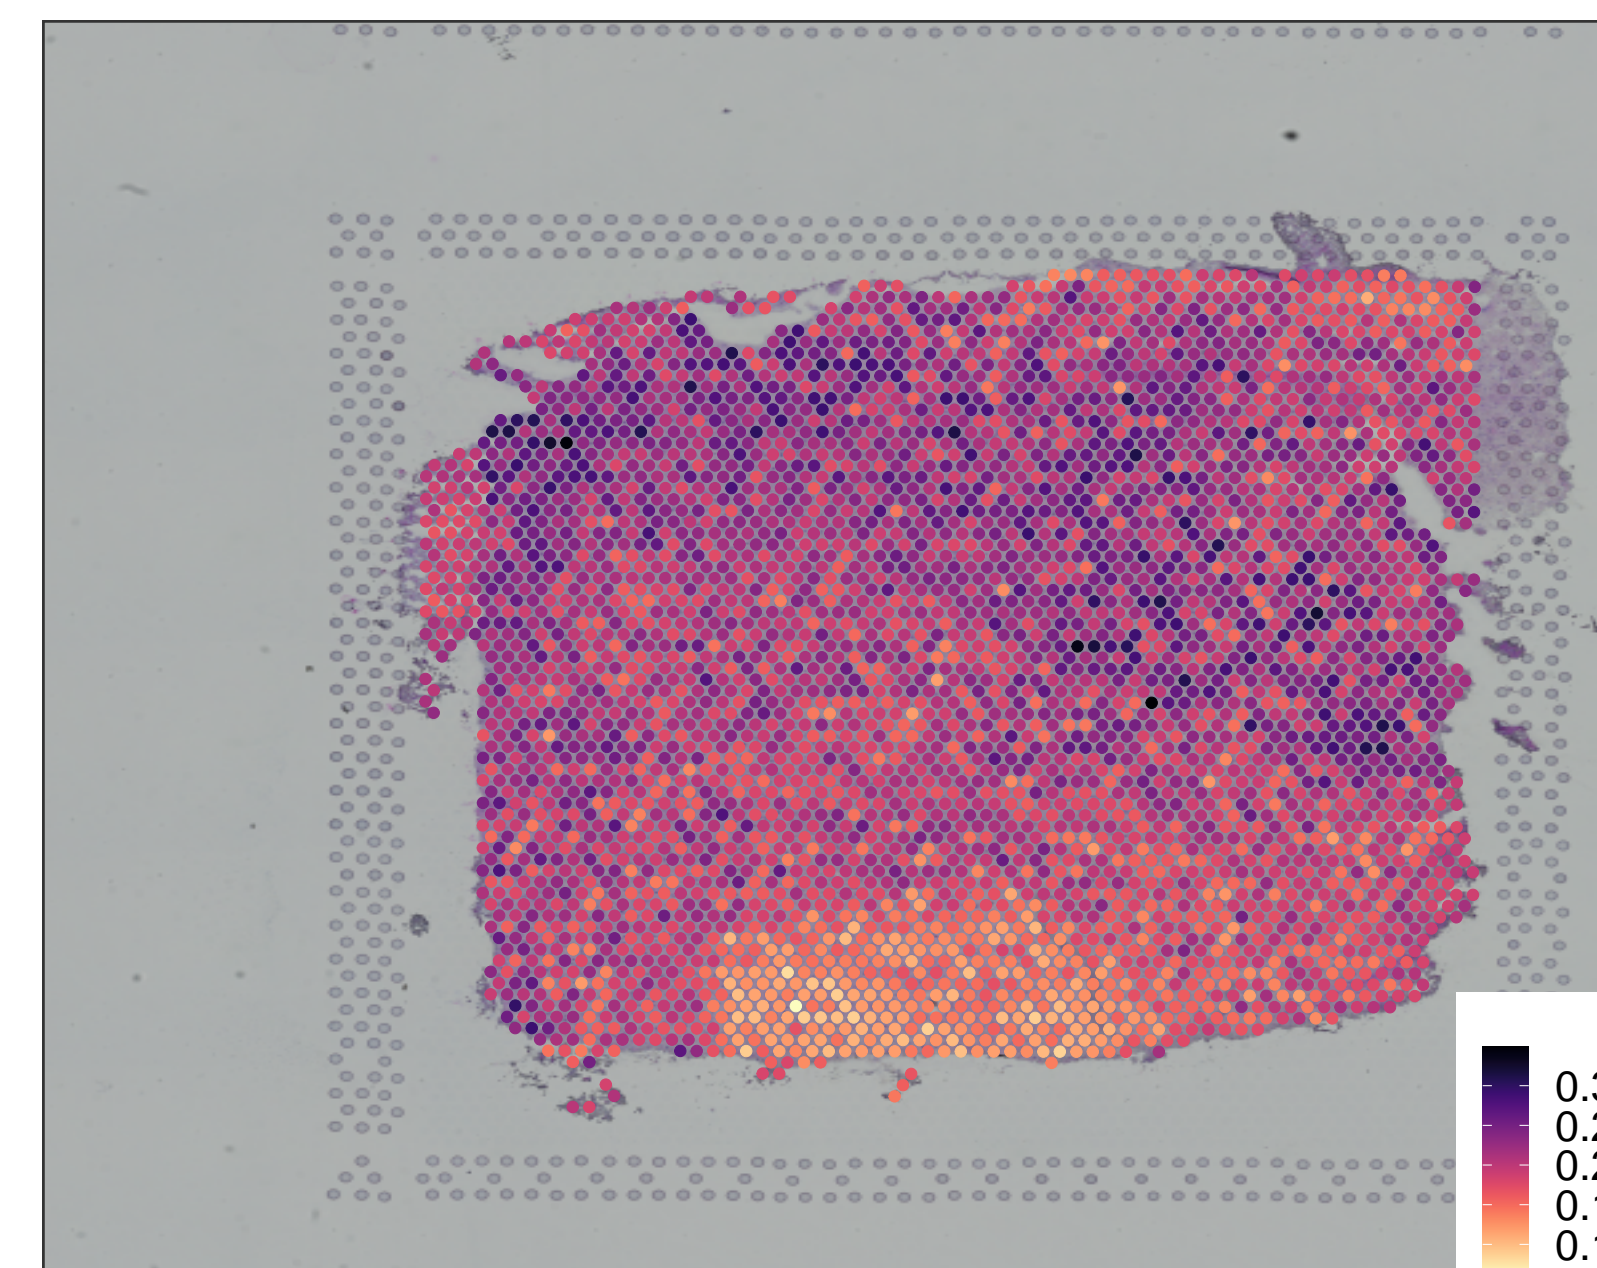

min &gt; -1

151673 expr\_chrM\_ratio

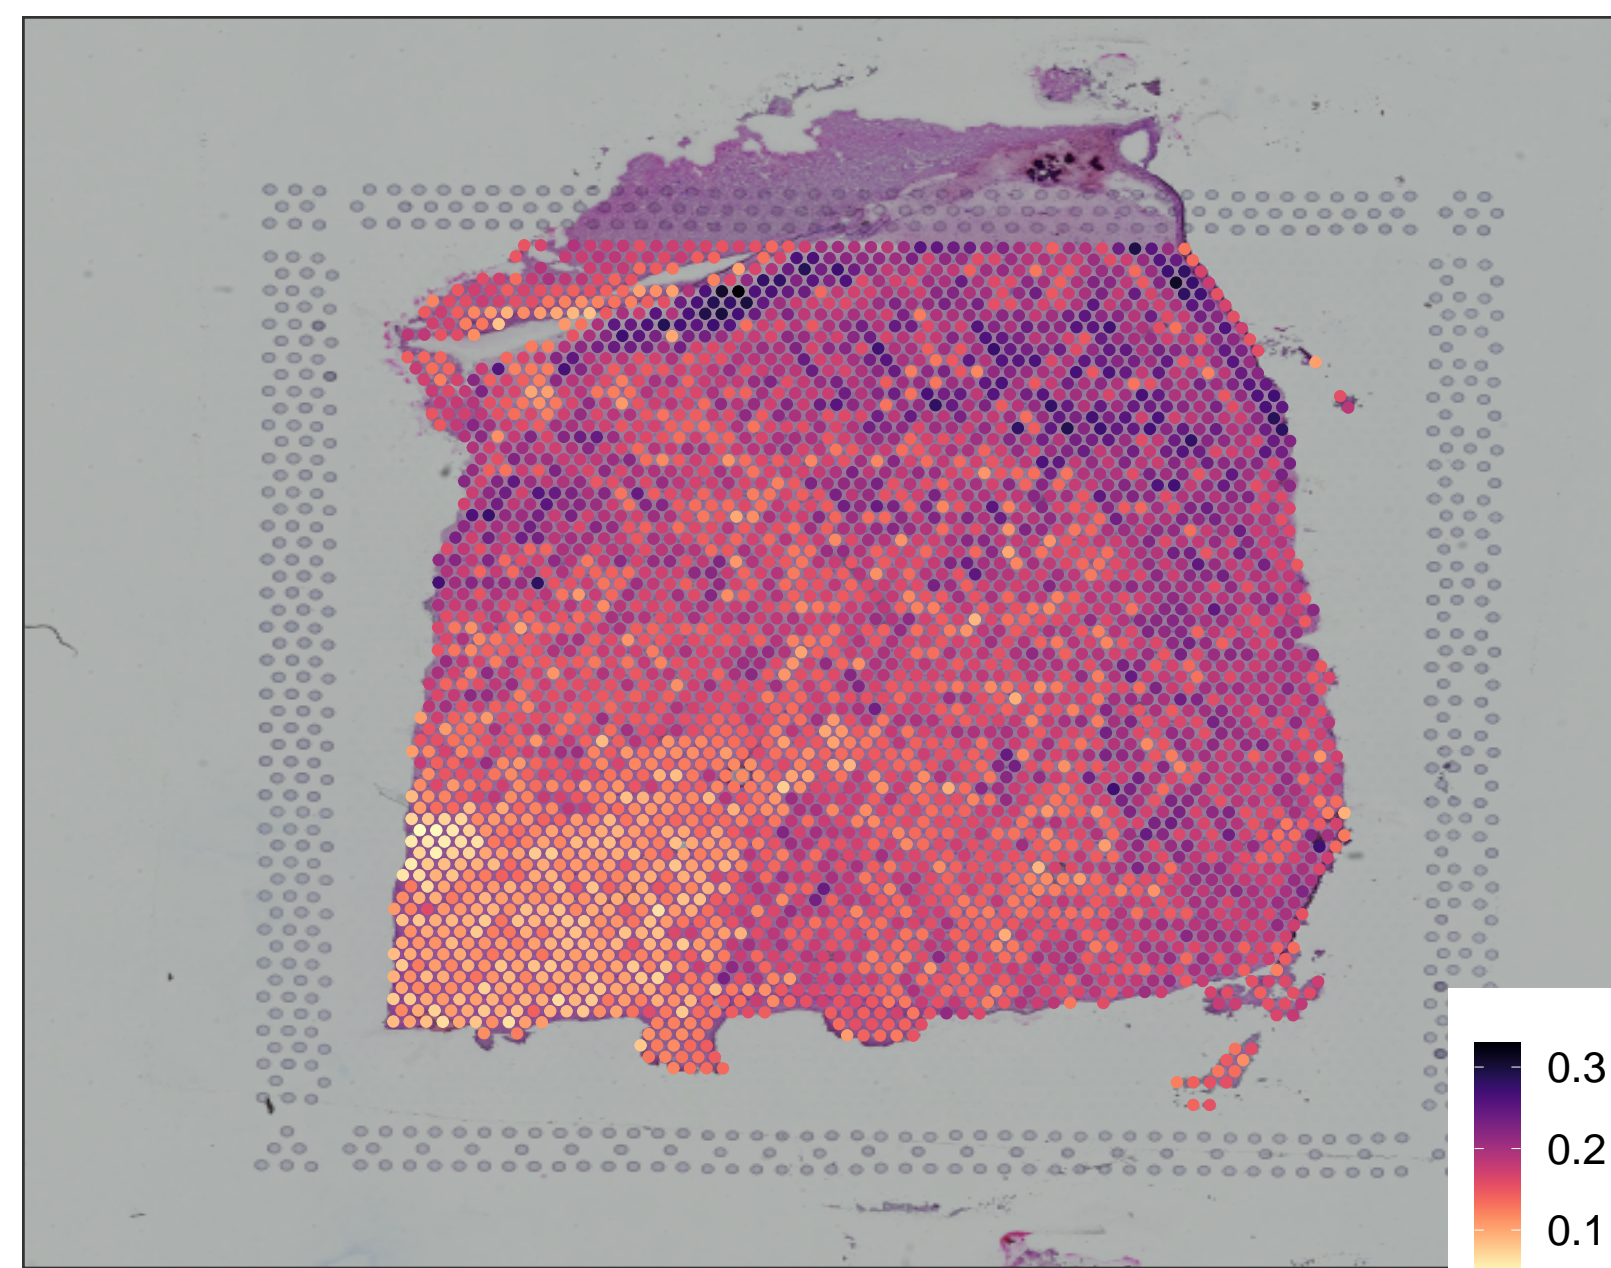

min &gt; -1

151674 expr\_chrM\_ratio

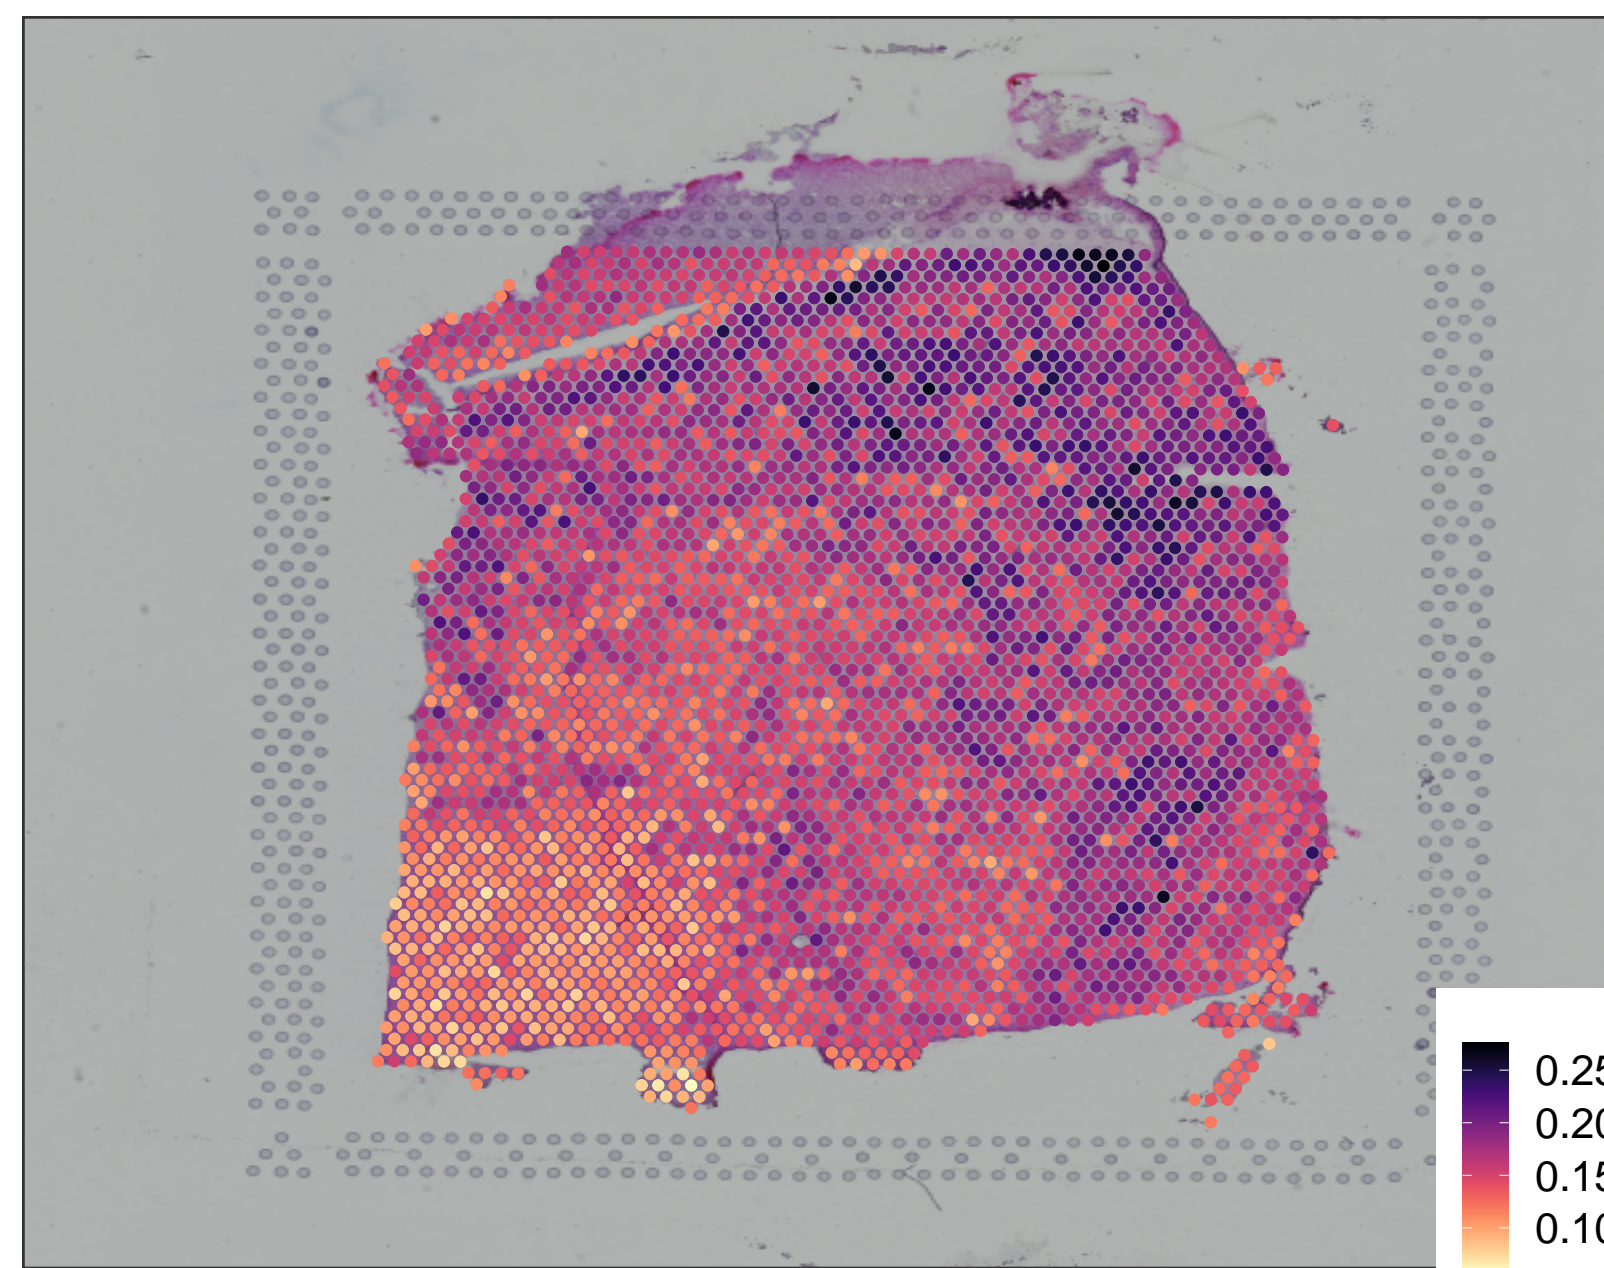

min &gt; -1

151675 expr\_chrM\_ratio

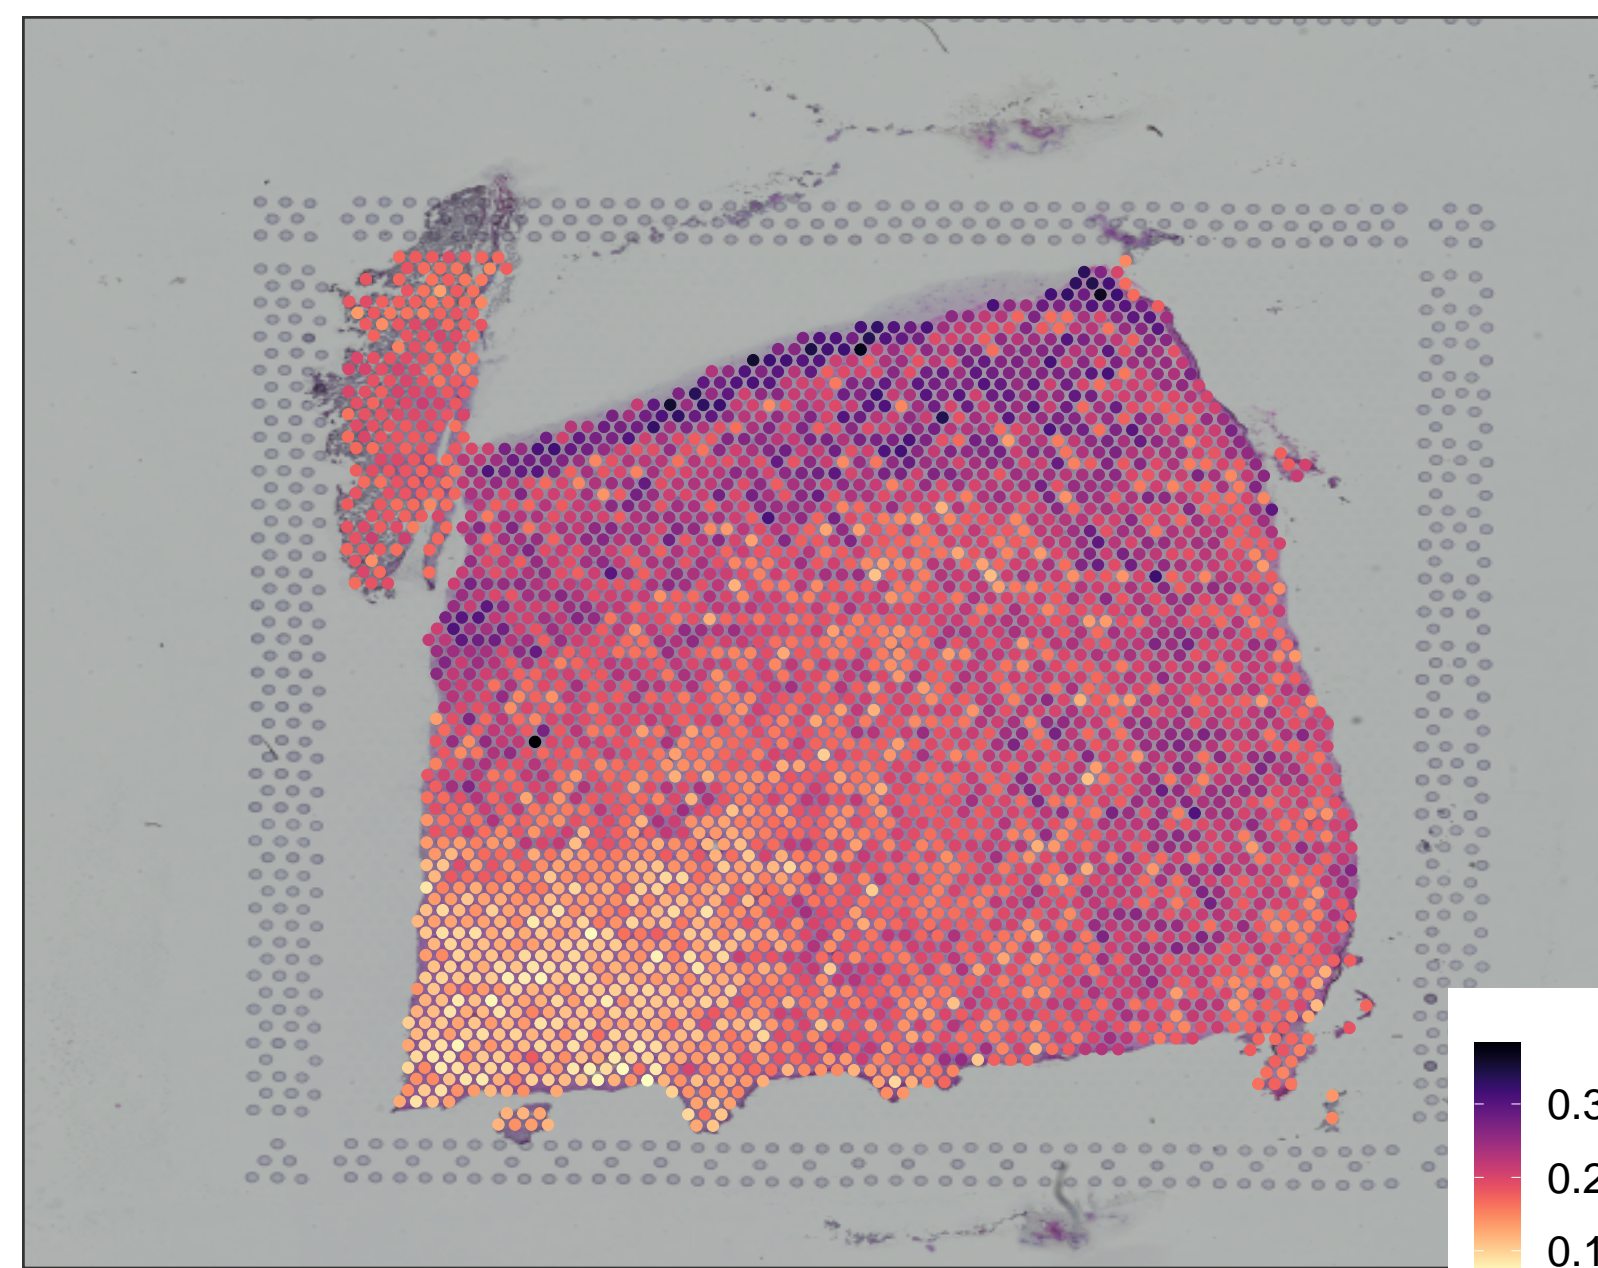

min &gt; -1

151676 expr\_chrM\_ratio

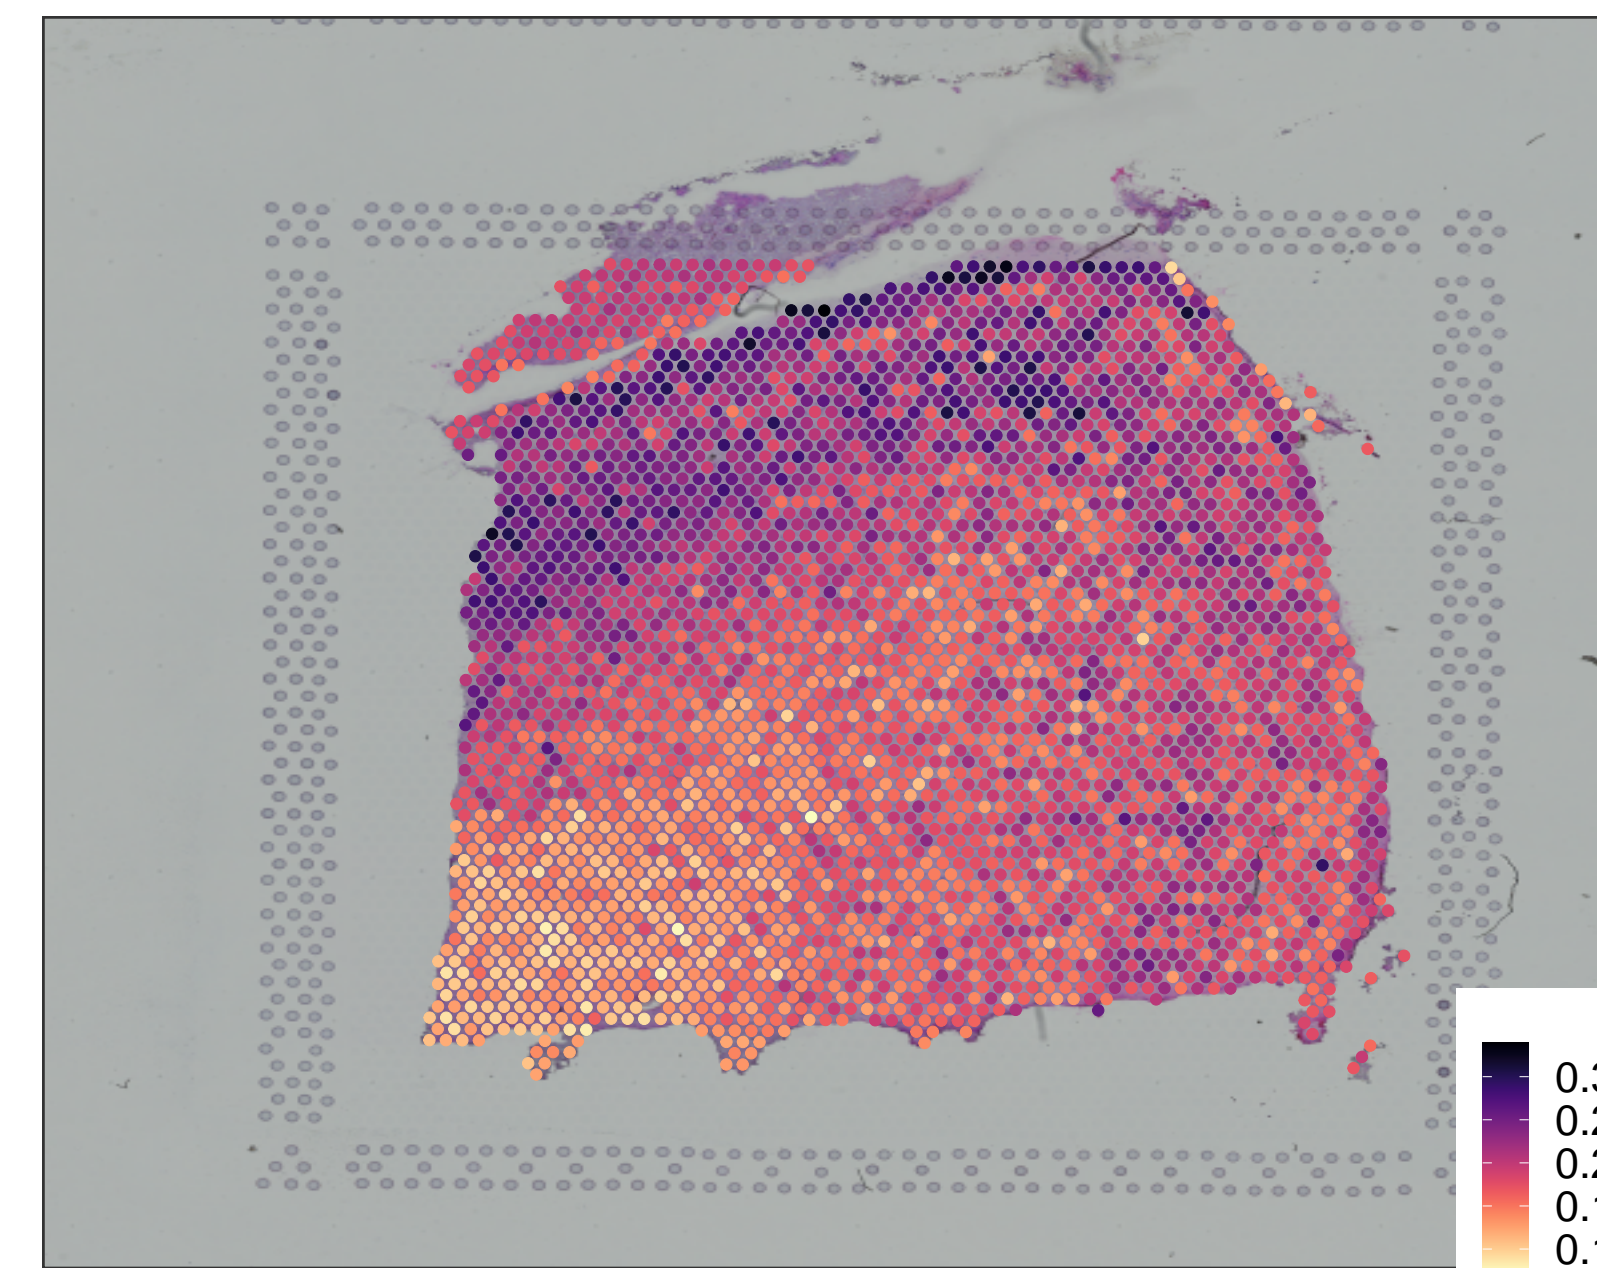

min &gt; -1
